# Supplementary material for: Metal-free synthesis of 1,N6-ethenoadenines from N6-propargyl-adenines via NIS mediated radical cascade reaction
Source: Royal Society of Chemistry journal article supplement (doi:10.1039/c9ra09198j), 2019-01-01

## Metal-free synthesis of 1,*N*<sup>6</sup>-ethenoadenine from *N*<sup>6</sup>-propargyl-adenine *via* NIS mediated radical cascade reaction

Ruchun Yang,<sup>a,b</sup> Si Deng,<sup>b</sup> Xiangyou Dong,<sup>b</sup> Xian-Rong Song,<sup>b</sup> Hu Cai<sup>a,\*</sup> Jiang Bai,<sup>b</sup> Qiang Xiao<sup>b,\*</sup>

<sup>a</sup> Institute of Chemistry, Nanchang University, Jiangxi Province, Nanchang 330031, China. E-mail: caihu@ncu.edu.cn

<sup>b</sup> Institute of Organic Chemistry, Jiangxi Science & Technology Normal University, Key Laboratory of Organic Chemistry, Jiangxi Province, Nanchang 330013, China. E-mail: xiaoqiang@tsinghua.org.cn

### Table of Contents

|          |                                                                                  |                |
|----------|----------------------------------------------------------------------------------|----------------|
| <b>1</b> | <b>General Considerations</b>                                                    | <b>S2</b>      |
| <b>2</b> | <b>General Procedure for Cascade Cyclization-Oxidation Reaction</b>              | <b>S2</b>      |
| <b>3</b> | <b><sup>18</sup>O<sub>2</sub> Experiment</b>                                     | <b>S2</b>      |
| <b>4</b> | <b>Ultraviolet spectrum and Fluorescence emission spectrum of compound 2t-2w</b> | <b>S3-S4</b>   |
| <b>5</b> | <b>Characterization Data for Isolated Products 2a-2w</b>                         | <b>S4-S11</b>  |
| <b>6</b> | <b>Crystal Preparation and X-ray diffraction of analysis of compound 2n</b>      | <b>S12</b>     |
| <b>7</b> | <b><sup>1</sup>H NMR and <sup>13</sup>C NMR Spectra for Compounds 2a-2w</b>      | <b>S13-S33</b> |

## General Considerations

All reagents were purchased from commercial sources and used without further treatment, unless otherwise indicated. Other materials were prepared according to the literature [1]. Dioxane were dried over  $\text{CaH}_2$ , distilled under reduced pressure, and stored under an argon atmosphere over activated 4 Å molecular sieves in Teflon screwed Schlenk flasks before using them.  $^1\text{H}$  and  $^{13}\text{C}$  NMR spectra were recorded on Bruker 400 MHz spectrometers or Bruker 500 MHz spectrometers, chemical shifts are given in parts per million (ppm) relative to standard tetramethylsilane (0.00 ppm for  $^1\text{H}$  NMR) or residual solvent peaks for  $^{13}\text{C}$  NMR. HRMS was obtained using a Q-TOF instrument equipped with ESI source. Fluorescence spectra were measured with a Hitachi F-4600 fluorescence spectrophotometer. UV-vis absorption spectra were recorded on an Agilent 8453 UV/Vis spectrophotometer equipped with an MUA-165 UV lamp and MVL-210 visible lamp for photoirradiation. Standard column chromatography was performed on 200-300 mesh silica gel. using flash column chromatography techniques.

## General procedure for cascade cyclization-oxidation reaction

NIS (27.0 mg, 0.12 mmol) was added to a stirred solution of **1a-1w** (0.1 mmol) in dioxane (2 mL). The resulting mixture was stirred at room temperature in the air and the progress of the reaction was monitored by thin-layer chromatography. After completion of the reaction, the reaction mixture was quenched by slow addition of saturated sodium thiosulfate and extracted with EtOAc (3×5mL). The combined organic layer was dried over anhydrous  $\text{Na}_2\text{SO}_4$  and concentrated under reduced pressure. The crude product was purified by column chromatography on silica gel to give the corresponding product **2a-2w**.

## $^{18}\text{O}_2$ experiment

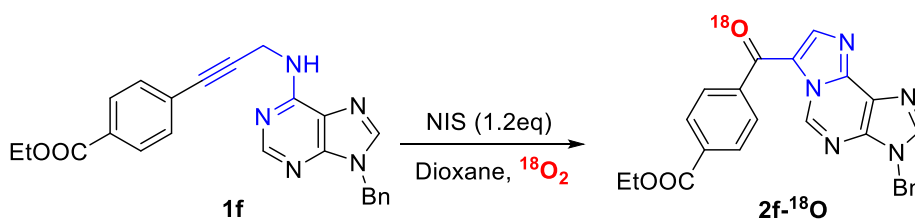

The product was detected by HRMS. HRMS (ESI, m/z): calcd for  $\text{C}_{24}\text{H}_{20}\text{N}_5\text{O}_2^{18}\text{O}$ :  $[\text{M}+\text{H}]^+ = 428.1603$ ; found: 428.1696.

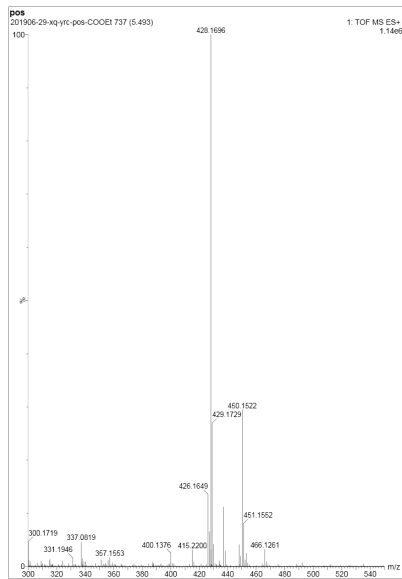

### Ultraviolet spectrum and fluorescence emission spectrum of compound 2t-2w

Ultraviolet spectrum ( $1 \times 10^{-4}$  mol/L in Methanol)

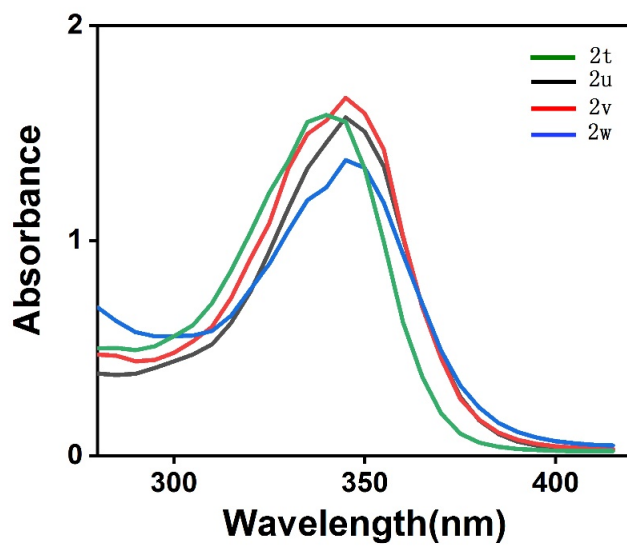

Fluorescence emission spectrum ( $2 \times 10^{-5}$  mol/L in Methanol)

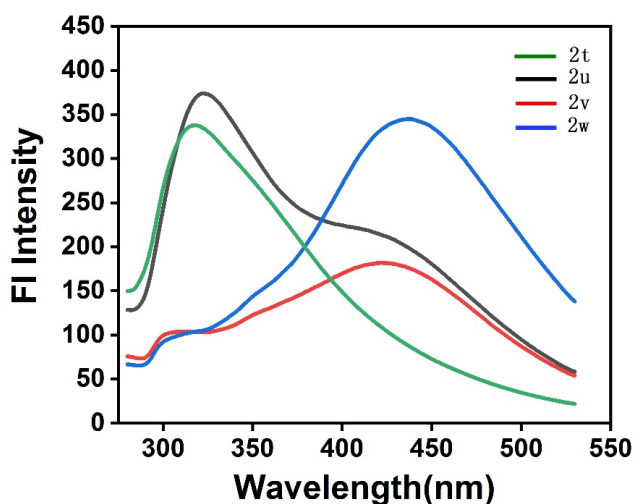

Excitation wavelength: 270nm

Emission wavelength: **2t**: 318nm, **2u**: 322nm, **2v**: 422nm, **2w**: 437nm

### Characterization Data for Isolated Products

#### (3-benzyl-3H-imidazo[2,1-i] purin-7-yl) (phenyl)methanone (**2a**):

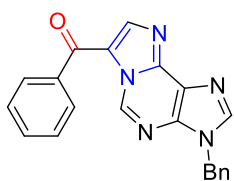

The resultant residue was purified by flash silica gel column chromatography to afford **2a** as a white solid,  $^1\text{H}$  NMR (500 MHz,  $\text{CDCl}_3$ )  $\delta$  10.36 (s, 1H), 8.24 (s, 1H), 8.09 (s, 1H), 7.91 (d,  $J = 5.4$  Hz, 2H), 7.66–7.56 (m, 3H), 7.40–7.34 (m, 5H), 5.56 (s, 2H).  $^{13}\text{C}$  NMR (126 MHz,  $\text{CDCl}_3$ )  $\delta$  184.9, 146.3, 145.3, 142.1, 141.9, 138.8, 137.8, 136.1, 132.6, 129.2, 128.9, 128.8, 128.7, 127.8, 123.6, 123.2, 48.1. HRMS (ESI,  $m/z$ ): calcd for  $\text{C}_{21}\text{H}_{16}\text{N}_5\text{O}$ :  $[\text{M}+\text{H}]^+ = 354.1349$ ; found: 354.1347.

#### (3-benzyl-3H-imidazo[2,1-i] purin-7-yl) (4-chlorophenyl) methanone (**2b**):

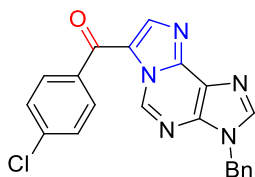

The resultant residue was purified by flash silica gel column chromatography to afford **2b** as a white solid,  $^1\text{H}$  NMR (400 MHz, DMSO)  $\delta$  10.14 (s, 1H), 8.70 (s, 1H), 8.34 (s, 1H), 8.00 – 7.87 (m, 2H), 7.75 – 7.62 (m, 2H), 7.42 – 7.10 (m, 6H), 5.64 (s, 2H).  $^{13}\text{C}$  NMR (100 MHz, DMSO)  $\delta$  182.9, 146.3, 145.1, 144.2, 142.1, 137.7\*2, 137.4, 137.0, 131.3, 129.4, 129.3, 128.4, 127.9, 123.6, 123.0, 47.5. HRMS (ESI,  $m/z$ ): calcd for  $\text{C}_{21}\text{H}_{15}\text{ClN}_5\text{O}$ :  $[\text{M}+\text{H}]^+ = 388.0960$ ; found: 388.0964

#### (3-benzyl-3H-imidazo[2,1-i] purin-7-yl) (4-bromophenyl) methanone (**2c**):

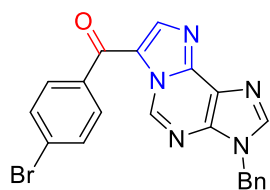

The resultant residue was purified by flash silica gel column chromatography to afford **2c** as a white solid,  $^1\text{H}$  NMR (400 MHz, DMSO)  $\delta$  10.13 (s, 1H), 8.70 (s, 1H), 8.33 (s, 1H), 7.94 – 7.76 (m, 4H), 7.63 – 7.28 (m, 5H), 5.64 (s, 2H).  $^{13}\text{C}$  NMR (100 MHz, DMSO)  $\delta$  183.1, 146.4, 145.4, 144.1, 142.0, 137.8, 137.7, 132.3, 131.4, 129.2, 128.4, 128.0, 126.8, 123.5, 123.0, 47.5. HRMS (ESI, m/z): calcd for  $\text{C}_{21}\text{H}_{15}\text{BrN}_5\text{O}$ :  $[\text{M}+\text{H}]^+ = 432.0454$ ; found: 432.0458

**(3-benzyl-3H-imidazo[2,1-i] purin-7-yl) (4-fluorophenyl) methanone (2d):**

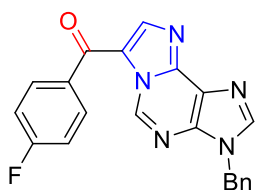

The resultant residue was purified by flash silica gel column chromatography to afford **2d** as a white solid,  $^1\text{H}$  NMR (500 MHz,  $\text{CDCl}_3$ )  $\delta$  10.32 (s, 1H), 8.22 (s, 1H), 8.10 (s, 1H), 7.95 (dd,  $J = 8.4, 5.4$  Hz, 2H), 7.42 – 7.33 (m, 5H), 7.29 – 7.22 (m, 2H), 5.56 (s, 2H).  $^{13}\text{C}$  NMR (126 MHz,  $\text{CDCl}_3$ )  $\delta$  183.3, 165.4 (d,  $J = 254.0$  Hz), 146.1, 145.5, 142.2, 141.9, 137.7, 136.0, 135.0, 134.9, 131.4 (d,  $J = 9.1$  Hz), 129.8, 128.7, 127.9, 123.4 (d,  $J = 16.0$  Hz), 116.0 (d,  $J = 22.0$  Hz), 48.2.

$^{19}\text{F}$  NMR (471 MHz,  $\text{CDCl}_3$ )  $\delta$  -105.84.

HRMS (ESI, m/z): calcd for  $\text{C}_{21}\text{H}_{15}\text{FN}_5\text{O}$ :  $[\text{M}+\text{H}]^+ = 372.1255$ ; found: 372.1257

**4-(3-benzyl-3H-imidazo[2,1-i] purine-7-carbonyl) benzonitrile (2e):**

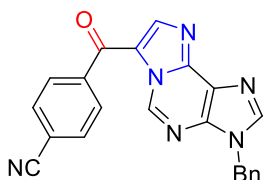

The resultant residue was purified by flash silica gel column chromatography to afford **2e** as a white solid,  $^1\text{H}$  NMR (400 MHz,  $\text{CDCl}_3$ )  $\delta$  10.34 (s, 1H), 8.21 (s, 1H), 8.12 (s, 1H), 8.00 (d,  $J = 7.9$  Hz, 2H), 7.88 (d,  $J = 8.0$  Hz, 2H), 7.34-7.38 (m, 5H), 5.57 (s, 2H).  $^{13}\text{C}$  NMR (126 MHz, DMSO)  $\delta$  182.6, 146.8, 145.9, 142.5, 142.3\*2, 137.7, 134.9, 132.7, 129.3, 129.2, 128.8, 127.9, 123.3, 123.2, 117.9, 115.8, 48.2.

HRMS (ESI, m/z): calcd for  $\text{C}_{22}\text{H}_{15}\text{N}_6\text{O}$ :  $[\text{M}+\text{H}]^+ = 379.1302$ ; found: 379.1308

**ethyl 4-(3-benzyl-3H-imidazo[2,1-i] purine-7-carbonyl) benzoate (2f):**

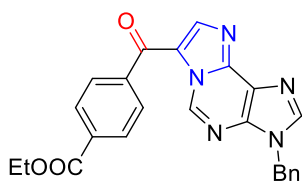

The resultant residue was purified by flash silica gel column chromatography to afford **2f** as a white solid,  $^1\text{H}$  NMR (500 MHz,  $\text{CDCl}_3$ )  $\delta$  10.36 (s, 1H), 8.22-8.24 (m, 3H), 8.12 (s, 1H), 7.95 (d,  $J = 8.1$  Hz, 1H), 7.42 – 7.31 (m, 5H), 5.57 (s, 1H), 4.45 (q,  $J = 7.1$  Hz, 2H), 1.45 (t,  $J = 7.1$  Hz, 3H).  $^{13}\text{C}$  NMR (126 MHz,  $\text{CDCl}_3$ )  $\delta$  183.9, 165.7, 146.7, 145.6, 142.3, 142.2, 142.1, 137.6, 135.0, 133.8, 129.9, 129.2, 128.8, 127.9, 123.5, 123.3, 61.5, 48.2, 14.3. HRMS (ESI,  $m/z$ ): calcd for  $\text{C}_{24}\text{H}_{19}\text{N}_5\text{O}_3$ :  $[\text{M}+\text{H}]^+ = 426.1561$ ; found: 426.1562

**(3-benzyl-3H-imidazo[2,1-i] purin-7-yl) (4-(trifluoromethyl) phenyl) methanone (2g):**

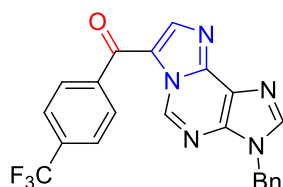

The resultant residue was purified by flash silica gel column chromatography to afford **2g** as a white solid,  $^1\text{H}$  NMR (500 MHz,  $\text{CDCl}_3$ )  $\delta$  10.35 (s, 1H), 8.22 (s, 1H), 8.12 (s, 1H), 8.01 (d,  $J = 7.9$  Hz, 1H), 7.84 (d,  $J = 8.0$  Hz, 1H), 7.35-7.38 (m, 5H).  $^{13}\text{C}$  NMR (126 MHz,  $\text{CDCl}_3$ )  $\delta$  183.4, 146.8, 145.7, 142.4, 142.2, 141.8, 137.7, 134.9, 133.9 (q,  $J = 32.8$  Hz), 129.3, 129.2, 128.8, 127.9, 125.8 (q,  $J = 2.52$  Hz), 123.6 (q,  $J = 273.4$  Hz), 123.4, 123.3, 48.2.  $^{19}\text{F}$  NMR (471 MHz,  $\text{CDCl}_3$ )  $\delta$  -62.95. HRMS (ESI,  $m/z$ ): calcd for  $\text{C}_{22}\text{H}_{15}\text{F}_3\text{N}_5\text{O}$ :  $[\text{M}+\text{H}]^+ = 422.1223$ ; found: 422.1227

**4-(3-benzyl-3H-imidazo[2,1-i] purine-7-carbonyl) benzaldehyde (2h):**

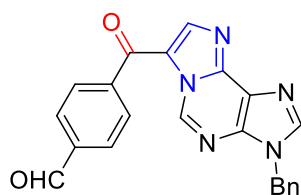

The resultant residue was purified by flash silica gel column chromatography to afford **2h** as a white solid,  $^1\text{H}$  NMR (500 MHz,  $\text{CDCl}_3$ )  $\delta$  10.37 (s, 1H), 10.17 (s, 1H), 8.23 (s, 1H), 8.12 (s, 1H), 8.07 (dd,  $J = 18.1, 7.9$  Hz, 4H), 7.41 – 7.33 (m, 5H), 5.57 (s, 2H).  $^{13}\text{C}$  NMR (126 MHz,  $\text{CDCl}_3$ )  $\delta$  191.5, 183.7, 146.9, 145.7, 143.6, 142.4, 142.2, 138.6, 137.7, 134.9, 130.0, 129.4, 129.2, 128.8, 127.9, 123.4, 123.3, 48.2. HRMS (ESI,  $m/z$ ): calcd for  $\text{C}_{22}\text{H}_{16}\text{N}_5\text{O}_2$ :  $[\text{M}+\text{H}]^+ = 382.1299$ ; found: 382.1294

**(3-benzyl-3H-imidazo[2,1-i] purin-7-yl) (4-nitrophenyl) methanone (2i):**

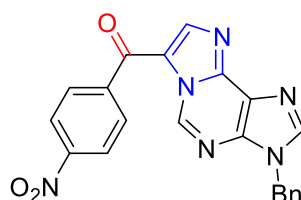

The resultant residue was purified by flash silica gel column chromatography to afford **2i** as a white solid,  $^1\text{H}$  NMR (500 MHz,  $\text{CDCl}_3$ )  $\delta$  10.35 (s, 1H), 8.43 (d,  $J = 8.2$  Hz, 2H), 8.22 (s, 1H), 8.13 (s, 1H), 8.06 (d,  $J = 8.3$  Hz, 2H), 7.36-7.39 (m, 5H), 5.58 (s, 2H).  $^{13}\text{C}$  NMR (126 MHz,  $\text{CDCl}_3$ )  $\delta$  182.3, 150.0, 147.1,

146.0, 143.9, 142.7, 142.3, 137.6, 134.9, 129.8, 129.3, 128.8, 127.9, 124.0, 123.4, 123.2, 47.9. HRMS (ESI, m/z): calcd for C<sub>21</sub>H<sub>15</sub>N<sub>6</sub>O<sub>3</sub>: [M+H]<sup>+</sup>= 399.1200; found: 399.1197

**3-benzyl-3H-imidazo[2,1-i] purin-7-yl) (3,5-dichlorophenyl) methanone (2j):**

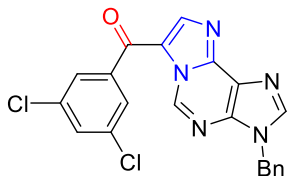

The resultant residue was purified by flash silica gel column chromatography to afford **2j** as a white solid, <sup>1</sup>H NMR (400 MHz, CDCl<sub>3</sub>) δ 10.29 (s, 1H), 8.25 (s, 1H), 8.11 (s, 1H), 7.75 (s, 2H), 7.61 (s, 1H), 7.40 – 7.34 (m, 4H), 5.56 (s, 2H). <sup>13</sup>C NMR (100 MHz, CDCl<sub>3</sub>) δ 181.5, 146.8, 145.9, 142.5, 142.2, 141.2, 137.7, 136.7, 134.9, 132.2, 129.2, 128.8, 127.9, 127.2, 123.3, 123.0, 48.0. HRMS (ESI, m/z): calcd for C<sub>21</sub>H<sub>14</sub>Cl<sub>2</sub>N<sub>5</sub>O: [M+H]<sup>+</sup>= 422.0570; found: 422.0566

**(3-benzyl-3H-imidazo[2,1-i] purin-7-yl) (2-chlorophenyl) methanone (2k):**

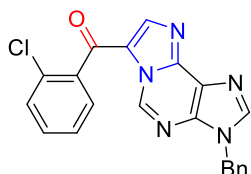

The resultant residue was purified by flash silica gel column chromatography to afford **2k** as a white solid, <sup>1</sup>H NMR (500 MHz, CDCl<sub>3</sub>) δ 10.40 (s, 1H), 8.11 (s, 1H), 7.94 (s, 1H), 7.57 – 7.46 (m, 3H), 7.45 – 7.32 (m, 6H), 5.57 (s, 2H). <sup>13</sup>C NMR (126 MHz, CDCl<sub>3</sub>) δ 183.1, 147.7, 145.8, 142.4, 142.2, 137.9, 137.7, 135.0, 131.7, 131.6, 130.6, 129.2\*2, 128.8, 127.9, 126.8, 123.9, 123.3, 48.2. HRMS (ESI, m/z): calcd for C<sub>21</sub>H<sub>15</sub>ClN<sub>5</sub>O: [M+H]<sup>+</sup>=388.0960; found: 388.0961

**(3-benzyl-3H-imidazo[2,1-i] purin-7-yl) (p-tolyl) methanone (2l):**

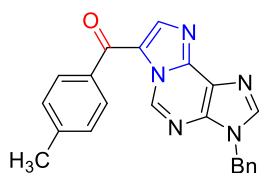

The resultant residue was purified by flash silica gel column chromatography to afford **2l** as a white solid, <sup>1</sup>H NMR (400 MHz, CDCl<sub>3</sub>) δ 10.33 (s, 1H), 8.22 (s, 1H), 8.07 (s, 1H), 7.82 (d, J = 7.2 Hz, 2H), 7.39 – 7.31 (m, 7H), 5.55 (s, 2H), 2.47 (s, 3H). <sup>13</sup>C NMR (100 MHz, CDCl<sub>3</sub>) δ 184.7, 145.9, 145.2, 143.3, 142.0, 141.8, 137.8, 136.1, 135.1, 129.4, 129.2, 129.1, 128.7, 127.9, 123.7, 123.3, 48.1, 21.7. HRMS (ESI, m/z): calcd for C<sub>22</sub>H<sub>18</sub>N<sub>5</sub>O: [M+H]<sup>+</sup>= 368.1506; found: 368.1503

**3-benzyl-3H-imidazo[2,1-i] purin-7-yl) (3-methoxyphenyl) methanone (2n):**

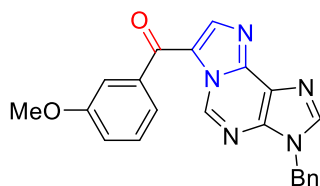

The resultant residue was purified by flash silica gel column chromatography to afford **2n** as a white solid,  $^1\text{H}$  NMR (400 MHz,  $\text{CDCl}_3$ )  $\delta$  10.34 (s, 1H), 8.26 (s, 1H), 8.08 (s, 1H), 7.49 – 7.32 (m, 8H), 7.21 – 7.16 (m, 1H), 5.56 (s, 2H), 3.89 (s, 3H).  $^{13}\text{C}$  NMR (100 MHz,  $\text{CDCl}_3$ )  $\delta$  184.6, 159.8, 146.3, 145.4, 142.1, 141.9, 140.1, 137.8, 136.1, 129.7, 129.2, 128.7, 127.9, 123.6, 123.3, 121.4, 118.8, 113.6, 55.6, 48.1. HRMS (ESI,  $m/z$ ): calcd for  $\text{C}_{22}\text{H}_{19}\text{N}_5\text{O}_2$ :  $[\text{M}+\text{H}]^+ = 384.1455$ ; found: 384.1459

**[1,1'-biphenyl]-4-yl(3-benzyl-3H-imidazo[2,1-i] purin-7-yl) methanone (2p):**

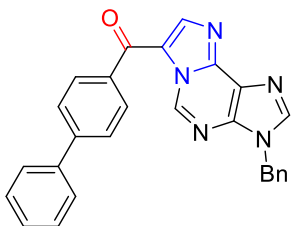

The resultant residue was purified by flash silica gel column chromatography to afford **2p** as a white solid,  $^1\text{H}$  NMR (500 MHz,  $\text{CDCl}_3$ )  $\delta$  10.38 (s, 1H), 8.31 (s, 1H), 8.10 (s, 1H), 8.01 (d,  $J = 7.9$  Hz, 2H), 7.79 (d,  $J = 7.9$  Hz, 2H), 7.69 (d,  $J = 7.6$  Hz, 2H), 7.51 (t,  $J = 7.5$  Hz, 2H), 7.44 – 7.33 (m, 6H), 5.57 (s, 1H).  $^{13}\text{C}$  NMR (126 MHz,  $\text{CDCl}_3$ )  $\delta$  184.4, 146.2, 145.4, 145.3, 142.1, 141.8, 139.8, 137.8, 137.4, 136.0, 129.6, 129.2, 129.0, 128.7, 128.2, 127.8, 127.4, 127.3, 123.7, 123.3, 48.1. HRMS (ESI,  $m/z$ ): calcd for  $\text{C}_{27}\text{H}_{20}\text{N}_5\text{O}$ :  $[\text{M}+\text{H}]^+ = 430.1662$ ; found: 430.1657

**(3-benzyl-3H-imidazo[2,1-i] purin-7-yl) (naphthalen-1-yl) methanone (2q):**

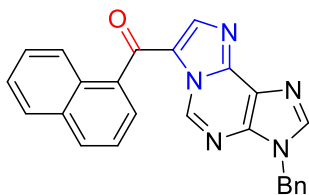

The resultant residue was purified by flash silica gel column chromatography to afford **2q** as a white solid,  $^1\text{H}$  NMR (400 MHz,  $\text{CDCl}_3$ )  $\delta$  10.53 (s, 1H), 8.26 – 8.21 (m, 1H), 8.10 (s, 1H), 8.06 (d,  $J = 8.3$  Hz, 1H), 8.01 (s, 1H), 7.98 – 7.89 (m, 1H), 7.80 (d,  $J = 7.0$  Hz, 1H), 7.57-7.60 (m, 3H), 7.40 – 7.34 (m, 5H).  $^{13}\text{C}$  NMR (126 MHz,  $\text{CDCl}_3$ )  $\delta$  186.0, 147.3, 145.7, 142.2, 142.1, 137.9, 136.2, 136.1, 133.9, 131.7, 130.7, 129.2, 128.8, 128.6, 127.9, 127.5, 127.4, 126.7, 125.2, 125.1, 124.4, 123.4, 48.2. HRMS (ESI,  $m/z$ ): calcd for  $\text{C}_{25}\text{H}_{18}\text{N}_5\text{O}$ :  $[\text{M}+\text{H}]^+ = 404.1506$ ; found: 404.1513

**phenyl(3-tosyl-3H-imidazo[2,1-i] purin-7-yl) methanone (2r):**



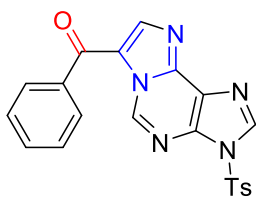

The resultant residue was purified by flash silica gel column chromatography to afford **2r** as a white solid,  $^1\text{H}$  NMR (500 MHz,  $\text{CDCl}_3$ )  $\delta$  10.39 (s, 1H), 8.58 (s, 1H), 8.24 (s, 1H), 8.20 (d,  $J = 8.4$  Hz, 2H), 7.89 (d,  $J = 7.7$  Hz, 2H), 7.65 (t,  $J = 7.4$  Hz, 1H), 7.57 (t,  $J = 7.7$  Hz, 1H), 7.40 (d,  $J = 8.3$  Hz, 1H), 2.44 (s, 1H).  $^{13}\text{C}$  NMR (126 MHz,  $\text{CDCl}_3$ )  $\delta$  184.8, 147.2, 146.0, 144.3, 140.1, 139.6, 138.9, 138.3, 133.7, 132.8, 130.3, 128.9, 128.8\*2, 124.7, 123.8, 21.8. HRMS (ESI,  $m/z$ ): calcd for  $\text{C}_{21}\text{H}_{16}\text{N}_5\text{O}_3\text{S}$ :  $[\text{M}+\text{H}]^+ = 418.0968$ ; found: 418.0966

**(1-benzyl-1H-imidazo[2,1-i] purin-7-yl) (phenyl) methanone (2s):**

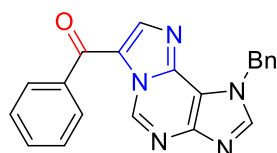

The resultant residue was purified by flash silica gel column chromatography to afford **2s** as a white solid,  $^1\text{H}$  NMR (400 MHz,  $\text{CDCl}_3$ )  $\delta$  10.34 (s, 1H), 10.34 (s, 1H), 8.17 (s, 1H), 8.10 (s, 1H), 7.92 (d,  $J = 7.2$  Hz, 2H), 7.65 (t,  $J = 7.4$  Hz, 1H), 7.57 (dd,  $J = 8.3, 6.9$  Hz, 2H), 7.51 – 7.24 (m, 5H), 5.85 (s, 2H).  $^{13}\text{C}$  NMR (100 MHz,  $\text{CDCl}_3$ )  $\delta$  184.7, 150.6, 145.2, 143.0, 141.5, 138.7, 137.3, 135.1, 132.6, 129.2, 128.9, 128.8, 128.7, 128.1, 123.8, 114.4, 51.2. HRMS (ESI,  $m/z$ ): calcd for  $\text{C}_{21}\text{H}_{16}\text{N}_5\text{O}$ :  $[\text{M}+\text{H}]^+ = 354.1349$ ; found: 354.1354

**((3aR,4R,6R,6aR)-6-(7-benzoyl-3H-imidazo[2,1-i] purin-3-yl)-2,2-dimethyltetrahydrofuro[3,4-d] [1,3] dioxol-4-yl) methyl 4-methylbenzoate (2t):**

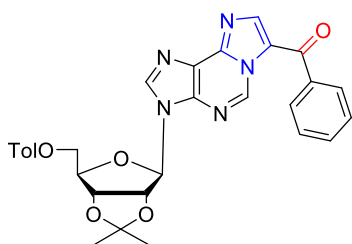

The resultant residue was purified by flash silica gel column chromatography to afford **2t** as a white solid,  $^1\text{H}$  NMR (400 MHz,  $\text{CDCl}_3$ )  $\delta$  10.24 (s, 1H), 8.21 (d,  $J = 9.2$  Hz, 2H), 7.91 (d,  $J = 7.7$  Hz, 2H), 7.77 (d,  $J = 8.2$  Hz, 2H), 7.69-7.57 (m, 3H), 7.13 (d,  $J = 8.3$  Hz, 2H), 6.27 (d,  $J = 2.2$  Hz, 1H), 5.58 (dd,  $J = 6.2$  Hz, 2.2 Hz, 1H), 5.22 (dd,  $J = 6.3, 3.0$  Hz, 1H), 4.68 – 4.65 (m, 2H), 4.51 (dd,  $J = 13.1, 5.8$  Hz, 1H), 2.31 (s, 3H), 1.71 (s, 3H), 1.45 (s, 3H).  $^{13}\text{C}$  NMR (100 MHz,  $\text{CDCl}_3$ )  $\delta$  184.7, 166.0, 146.1, 145.1, 144.1, 141.5, 140.5, 138.7, 137.8, 132.6, 129.6, 129.1, 128.9, 128.8, 126.5, 124.4, 123.6, 115.0, 91.7, 85.1, 84.5,

81.5, 63.8, 27.3, 25.5, 21.6. HRMS (ESI, m/z): calcd for C<sub>30</sub>H<sub>28</sub>N<sub>5</sub>O<sub>6</sub>: [M+H]<sup>+</sup>= 554.2034; found: 554.2032

**((3aR,4R,6R,6aR)-6-(7-(3,5-dichlorobenzoyl)-3H-imidazo[2,1-i] purin-3-yl)-2,2-dimethyltetrahydrofuro[3,4-d] [1,3] dioxol-4-yl) methyl 4-methylbenzoate (2u):**

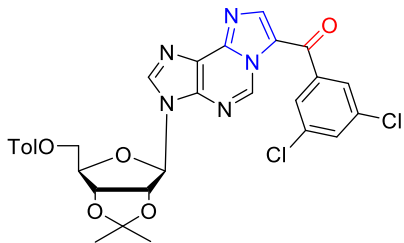

The resultant residue was purified by flash silica gel column chromatography to afford **2u** as a white solid, <sup>1</sup>H NMR (400 MHz, CDCl<sub>3</sub>) δ 10.18 (s, 1H), 8.23 (d, *J* = 7.8 Hz, 2H), 7.76-7.79 (m, 4H), 7.62-7.64 (m, 1H), 7.14 (d, *J* = 8.1 Hz, 2H), 6.27 (d, *J* = 2.2 Hz, 1H), 5.57 (dd, *J* = 6.2, 2.2 Hz, 1H), 5.22 (dd, *J* = 6.2, 3.0 Hz, 1H), 4.66-4.69 (m, 2H), 4.54 – 4.48 (m, 1H), 2.33 (s, 3H), 1.68 (s, 3H), 1.45 (s, 3H). <sup>13</sup>C NMR (100 MHz, CDCl<sub>3</sub>) δ 181.4, 166.0, 146.6, 145.6, 144.1, 141.8, 141.2, 141.0, 137.6, 135.8, 132.3, 129.6, 129.1, 127.2, 126.6, 124.5, 123.0, 115.1, 91.7, 85.1, 84.5, 81.5, 63.8, 27.3, 25.5, 21.7. HRMS (ESI, m/z): calcd for C<sub>30</sub>H<sub>26</sub>Cl<sub>2</sub>N<sub>5</sub>O<sub>6</sub>: [M+H]<sup>+</sup>=622.1255; found: 622.1255

**((3aR,4R,6R,6aR)-2,2-dimethyl-6-(7-(4-(trifluoromethyl) benzoyl)-3H-imidazo[2,1-i] purin-3-yl) tetrahydrofuro[3,4-d] [1,3] dioxol-4-yl) methyl 4-methylbenzoate (2v):**

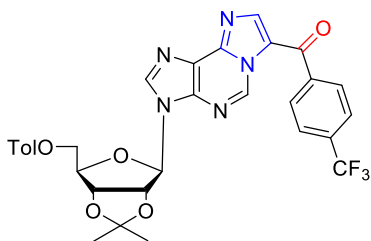

The resultant residue was purified by flash silica gel column chromatography to afford **2v** as a white solid, <sup>1</sup>H NMR (400 MHz, CDCl<sub>3</sub>) δ 10.23 (s, 1H), 8.21 (d, *J* = 6.9 Hz, 2H), 8.01 (d, *J* = 8.1 Hz, 2H), 7.84 (d, *J* = 8.2 Hz, 2H), 7.78 (d, *J* = 8.1 Hz, 2H), 7.14 (d, *J* = 8.0 Hz, 2H), 6.28 (d, *J* = 2.2 Hz, 1H), 5.58 (dd, *J* = 6.3, 2.2 Hz, 1H), 5.22 (dd, *J* = 6.3, 3.1 Hz, 1H), 4.669-4.66 (m, 2H), 4.54 – 4.47 (m, 1H), 2.32 (s, 3H), 1.68 (s, 3H), 1.45 (s, 3H). <sup>13</sup>C NMR (100 MHz, CDCl<sub>3</sub>) δ 183.2, 166.0, 146.6, 145.4, 144.1, 141.8\*2, 140.9, 137.6, 134.1 (q, *J* = 32.8 Hz), 129.6, 129.2, 129.1, 126.6, 125.9, 124.5, 123.6 (q, *J* = 273.0 Hz), 123.4, 115.1, 91.7, 85.1, 84.5, 81.5, 63.8, 27.3, 25.5, 14.1. HRMS (ESI, m/z): calcd for C<sub>31</sub>H<sub>27</sub>F<sub>3</sub>N<sub>5</sub>O<sub>6</sub>: [M+H]<sup>+</sup>= 622.1908; found: 622.1908

**((3aR,4R,6R,6aR)-6-(7-(4-(ethoxycarbonyl) benzoyl)-3H-imidazo[2,1-i] purin-3-yl)-2,2-dimethyltetrahydrofuro[3,4-d] [1,3] dioxol-4-yl) methyl 4-methylbenzoate (2w):**

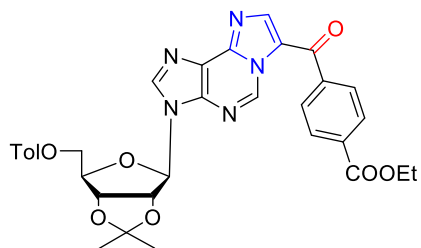

The resultant residue was purified by flash silica gel column chromatography to afford **2w** as a white solid,  $^1\text{H NMR}$  (400 MHz,  $\text{CDCl}_3$ )  $\delta$  10.24 (s, 1H), 8.25 – 8.23 (m, 4H), 7.96 (d,  $J = 8.2$  Hz, 2H), 7.78 (d,  $J = 8.1$  Hz, 2H), 7.14 (d,  $J = 8.0$  Hz, 2H), 6.28 (d,  $J = 2.1$  Hz, 1H), 5.58 (dd,  $J = 6.2, 2.1$  Hz, 1H), 5.23 (dd,  $J = 6.2, 3.2$  Hz, 1H), 4.70 – 4.62 (m, 2H), 4.55 – 4.39 (m, 4H), 2.32 (s, 3H), 1.69 (s, 3H), 1.47-1.43 (m, 6H).  $^{13}\text{C NMR}$  (125 MHz,  $\text{CDCl}_3$ )  $\delta$  183.8, 166.0, 165.7, 146.5, 145.2, 144.1, 142.2, 141.7, 140.7, 137.6, 133.8, 129.9, 129.5, 129.0, 128.7, 126.4, 124.4, 123.5, 115.0, 91.7, 85.0, 84.5, 81.4, 63.8, 61.5, 27.3, 25.5, 21.7, 14.3. HRMS (ESI,  $m/z$ ): calcd for  $\text{C}_{33}\text{H}_{32}\text{N}_5\text{O}_8$ :  $[\text{M}+\text{H}]^+ = 626.2245$ ; found: 626.2247

## Notes and references

- Li, R. L.; Liang, L.; Xie, M. S.; Qu, G. R.; Niu, H. Y.; Guo, H. M., *The Journal of organic chemistry* **2014**, *79*, 3665-70.

## Crystal preparation and X-ray diffraction analysis of compound 2n

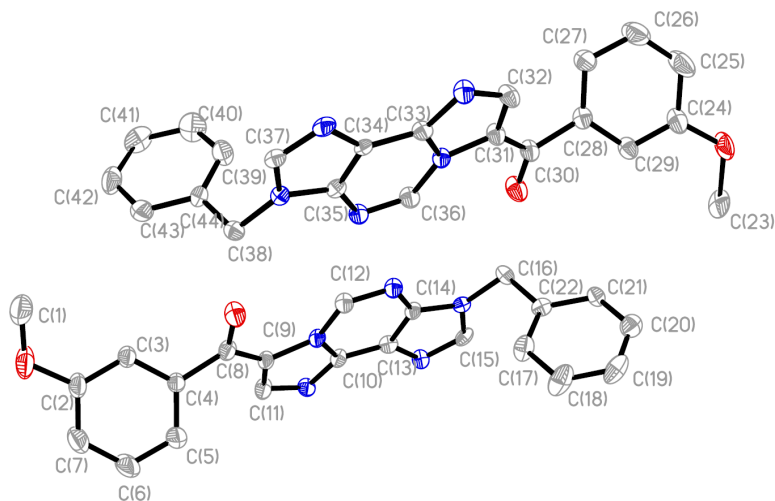

Crystal structure of compound 2n

## Datablock: Y

|                        |                |                                 |             |
|------------------------|----------------|---------------------------------|-------------|
| Bond precision:        | C-C = 0.0112 Å | Wavelength=0.71073              |             |
| Cell:                  | a=20.554(2)    | b=7.7056(8)                     | c=23.283(3) |
|                        | alpha=90       | beta=90                         | gamma=90    |
| Temperature:           | 296 K          |                                 |             |
|                        | Calculated     | Reported                        |             |
| Volume                 | 3687.6(7)      | 3687.6(7)                       |             |
| Space group            | P n a 21       | P n a 21                        |             |
| Hall group             | P 2c -2n       | P 2c -2n                        |             |
| Moiety formula         | C22 H17 N5 O2  | ?                               |             |
| Sum formula            | C22 H17 N5 O2  | C44 H34 N10 O4                  |             |
| Mr                     | 383.41         | 766.81                          |             |
| Dx, g cm <sup>-3</sup> | 1.381          | 1.381                           |             |
| Z                      | 8              | 4                               |             |
| Mu (mm <sup>-1</sup> ) | 0.093          | 0.093                           |             |
| F000                   | 1600.0         | 1600.0                          |             |
| F000'                  | 1600.62        |                                 |             |
| h,k,lmax               | 24,9,27        | 24,9,27                         |             |
| Nref                   | 6475[ 3325]    | 6451                            |             |
| Tmin,Tmax              | 0.977,0.980    |                                 |             |
| Tmin'                  | 0.977          |                                 |             |
| Correction method=     | Not given      |                                 |             |
| Data completeness=     | 1.94/1.00      | Theta(max)= 24.996              |             |
| R(reflections)=        | 0.0671( 4559)  | wR2(reflections)= 0.1730( 6451) |             |
| S =                    | 1.096          | Npar= 523                       |             |





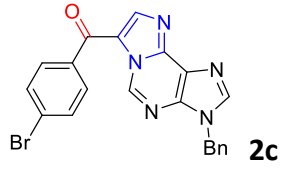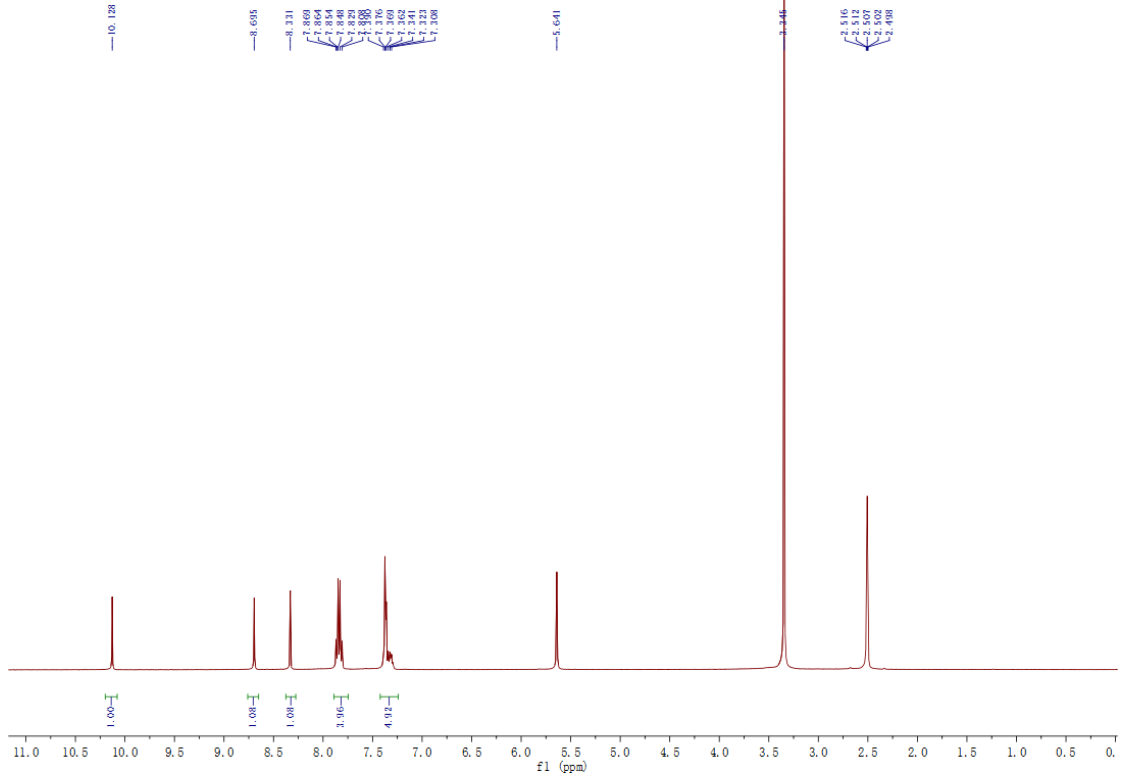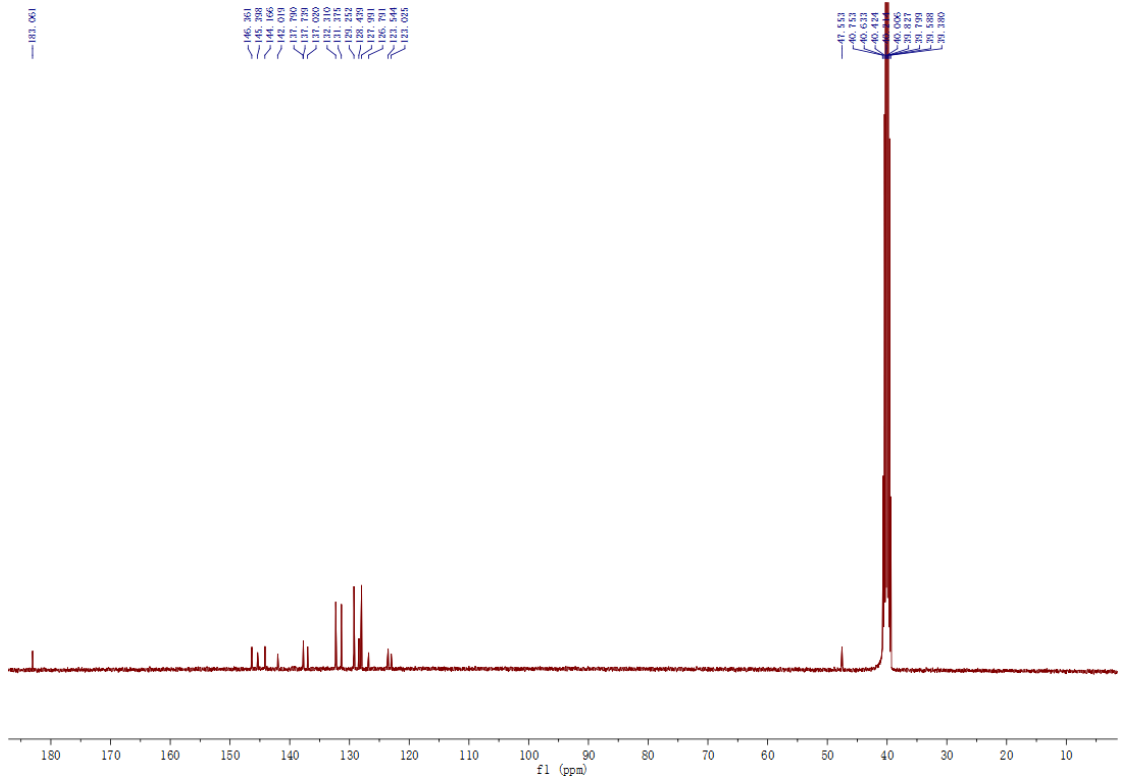

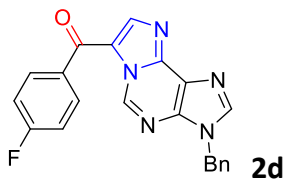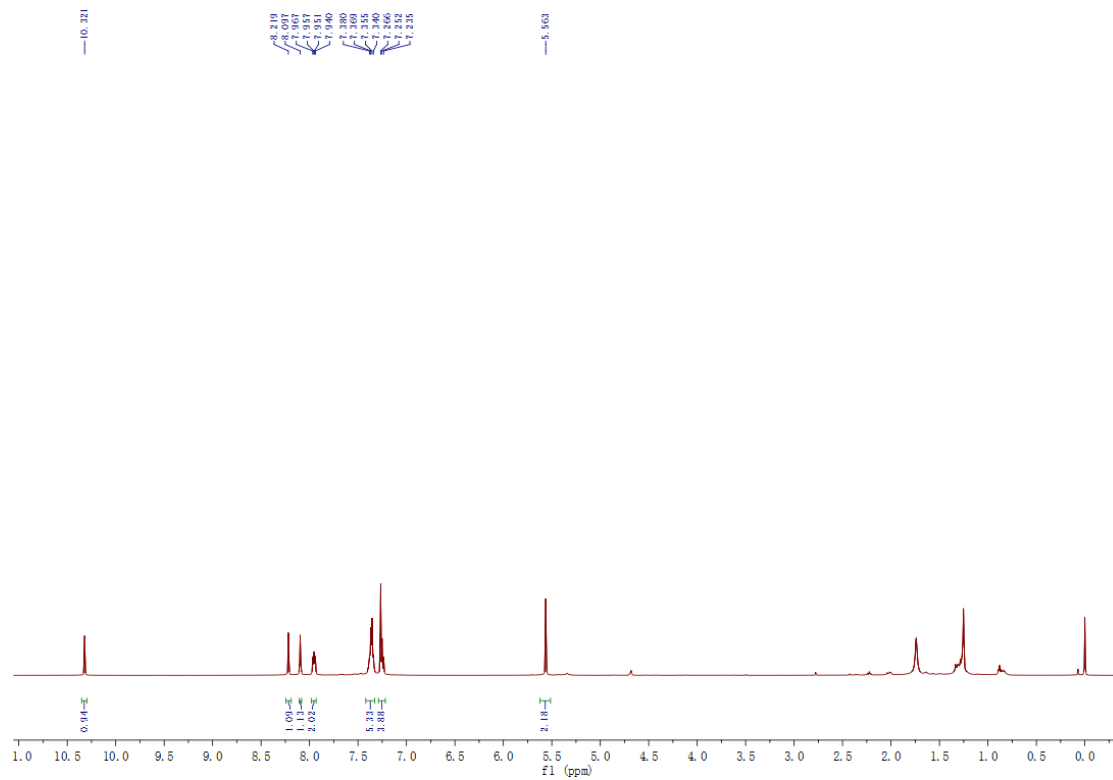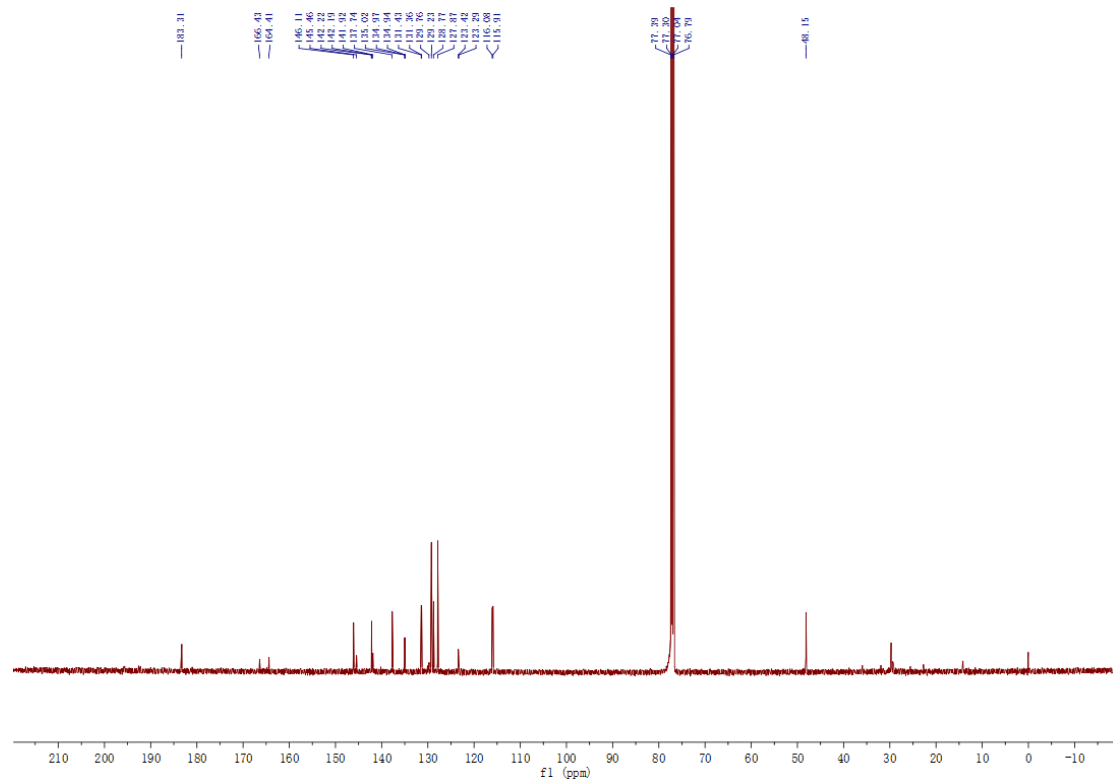



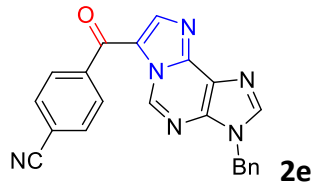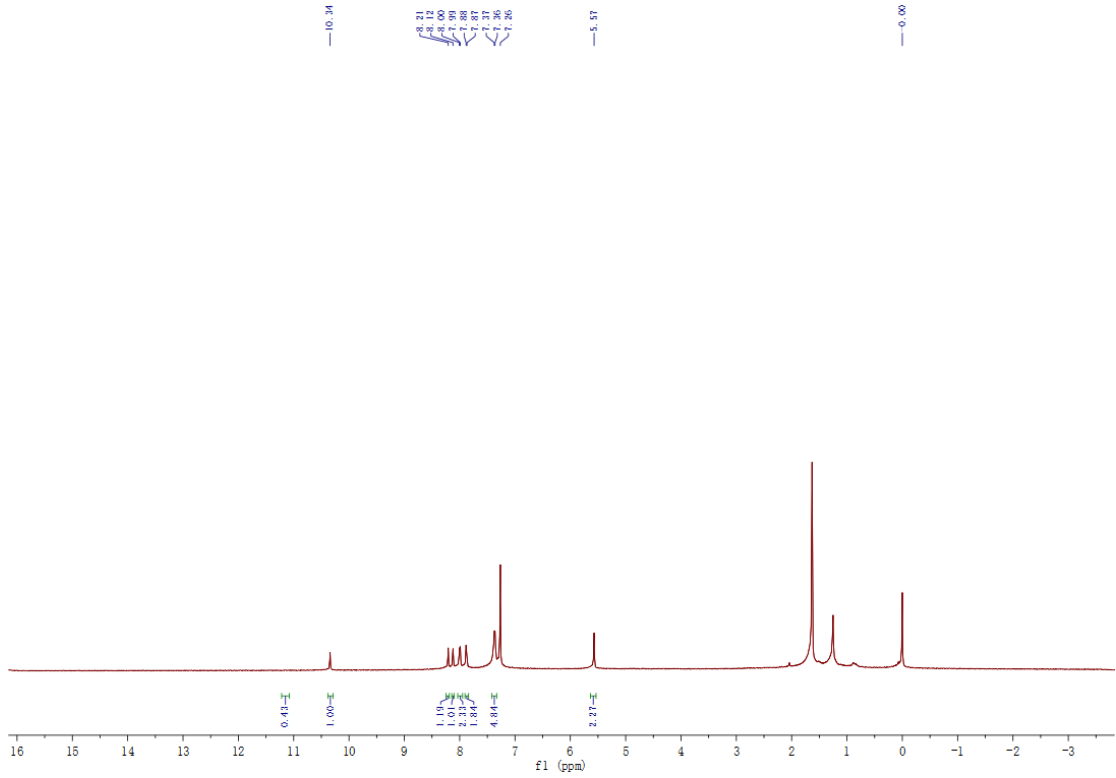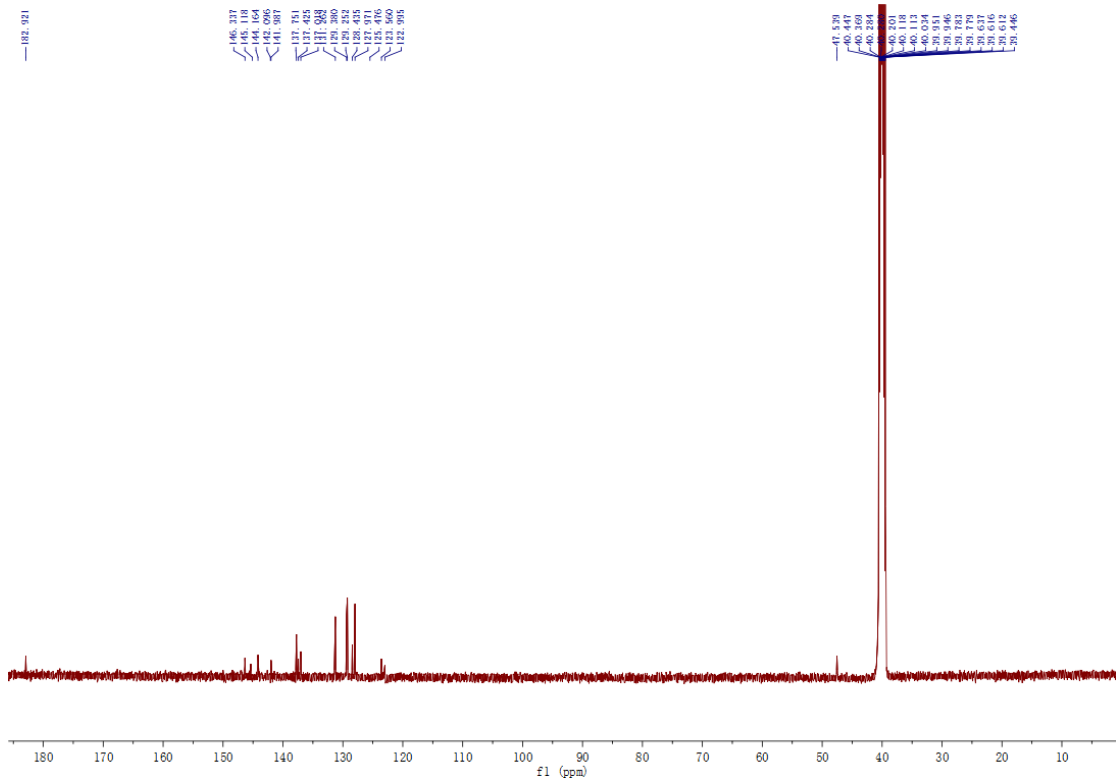



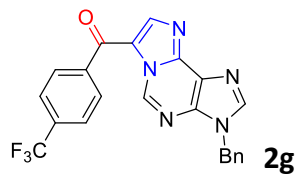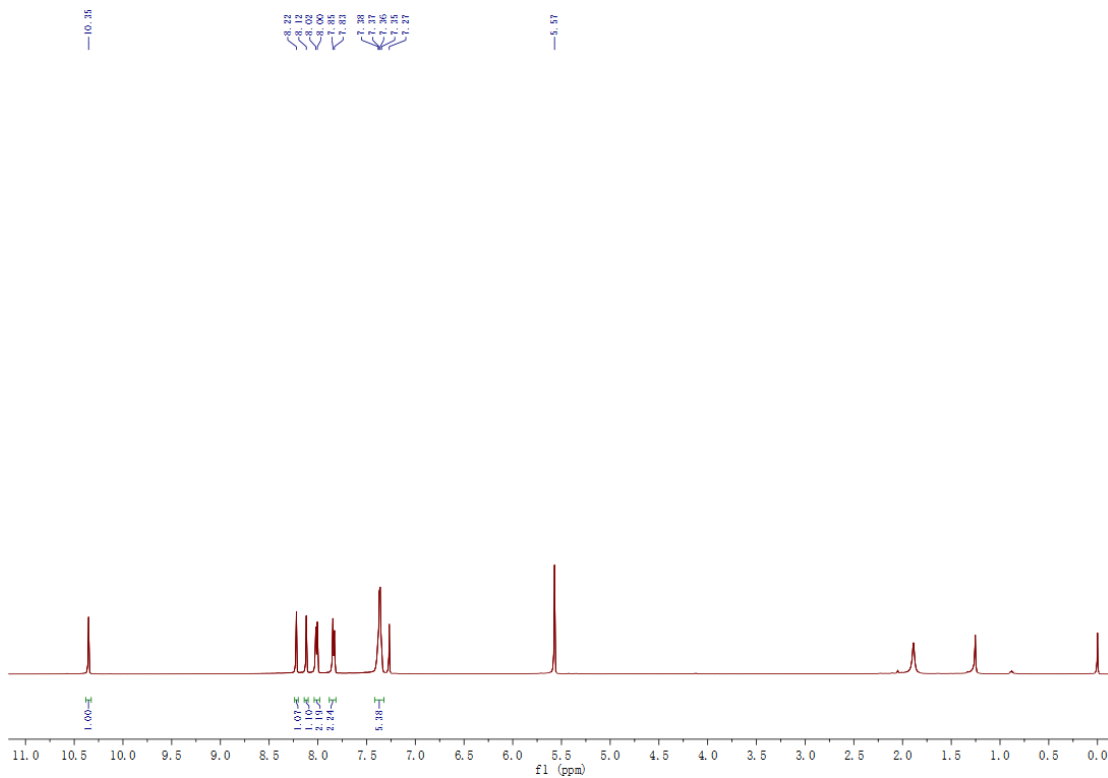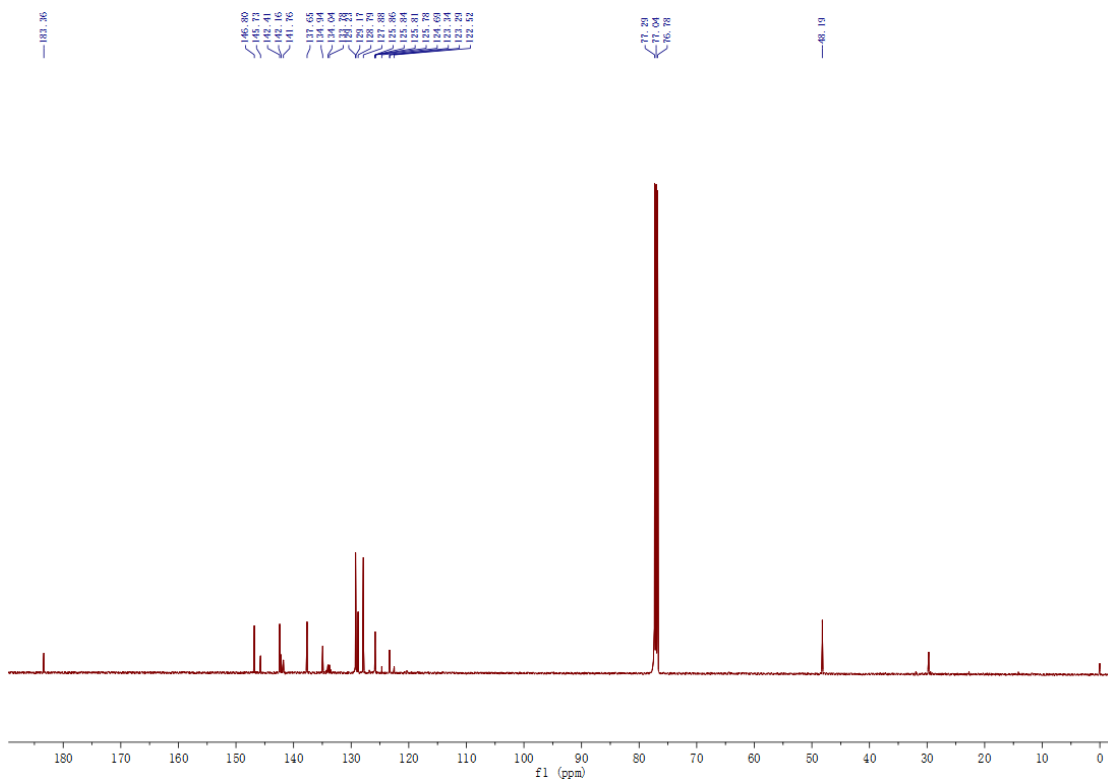

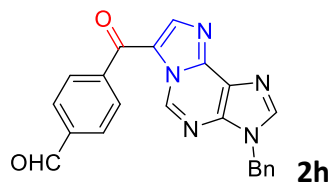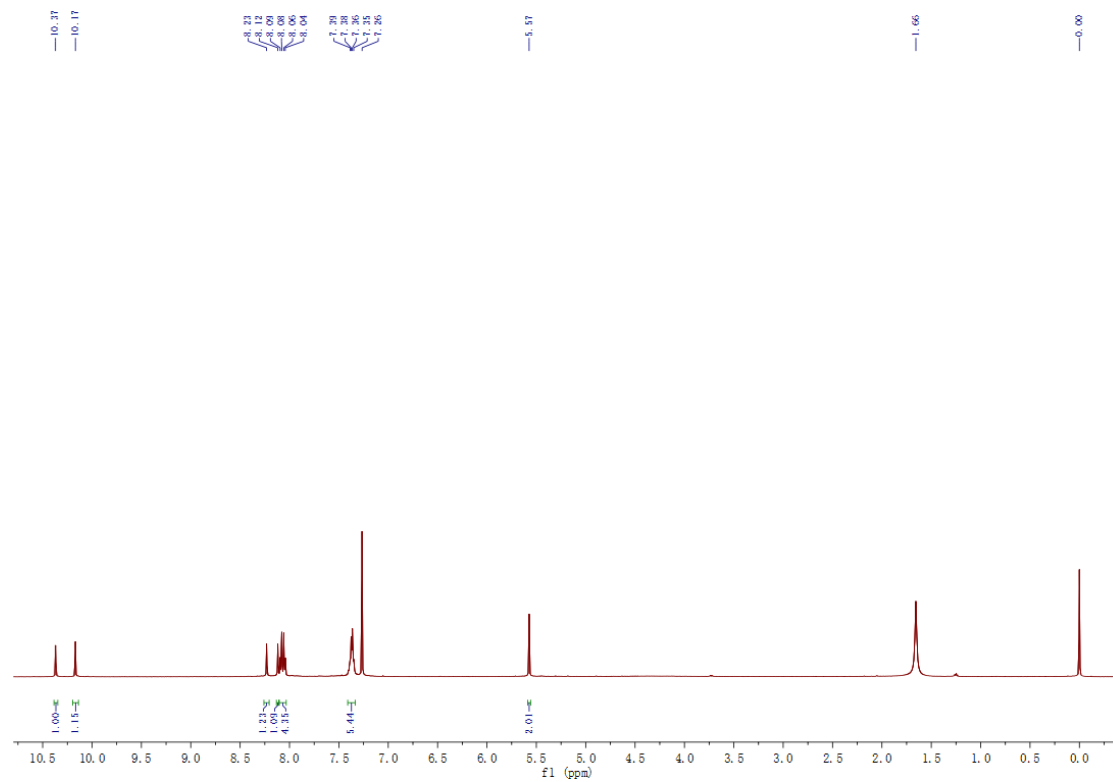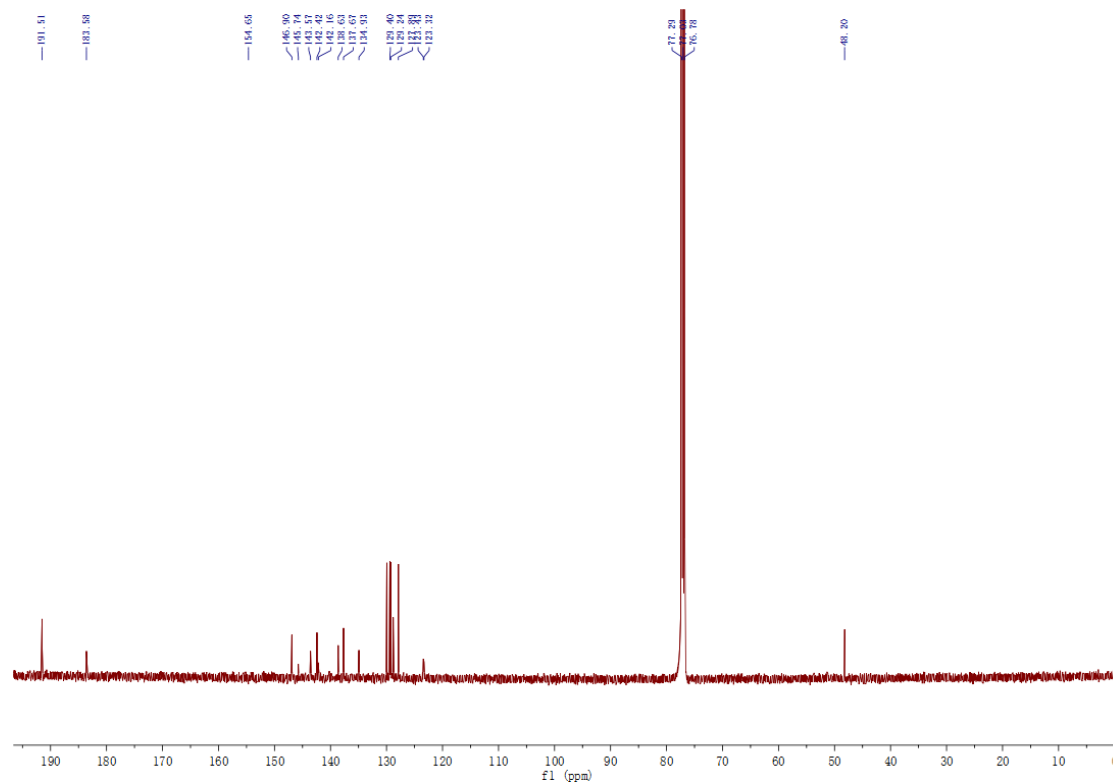



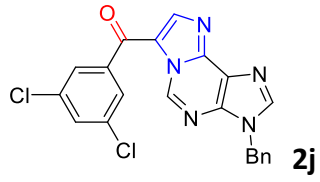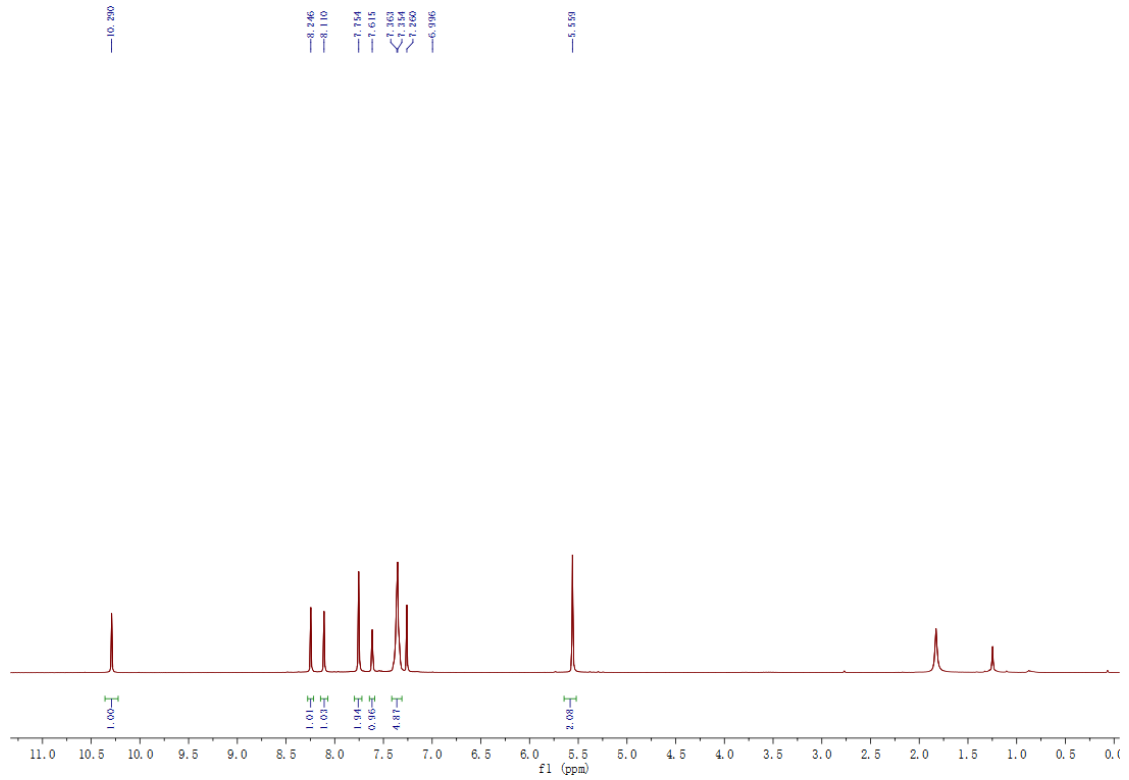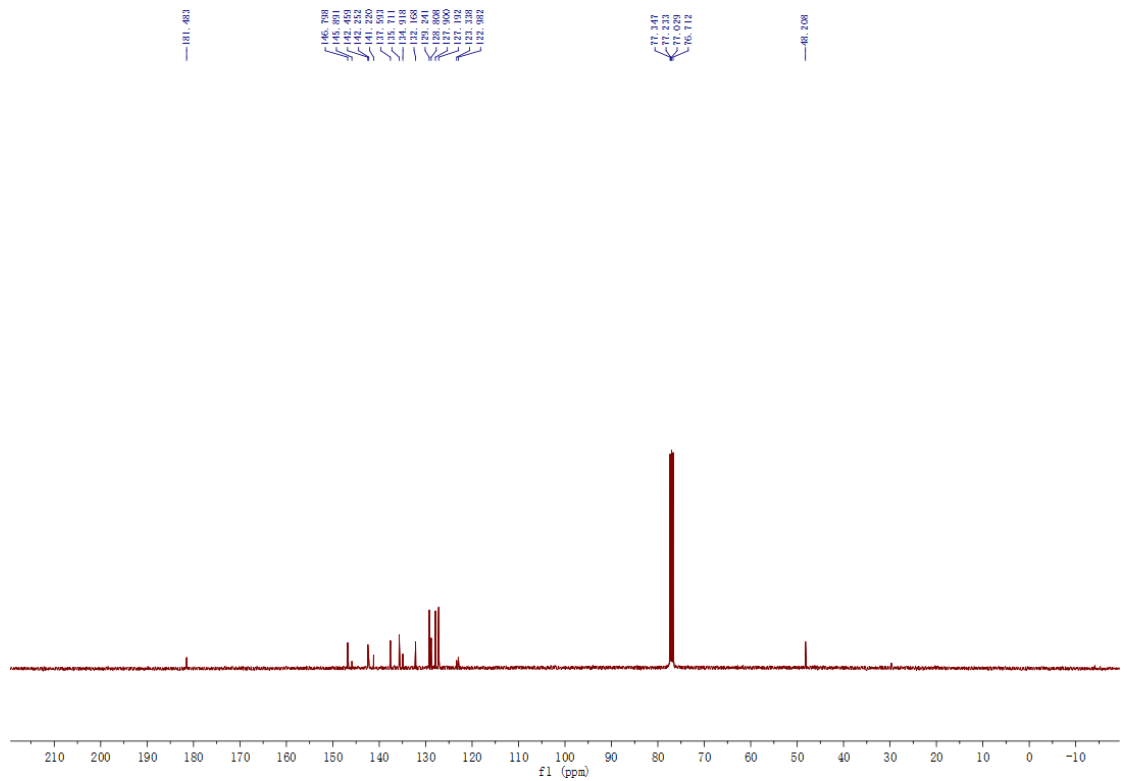

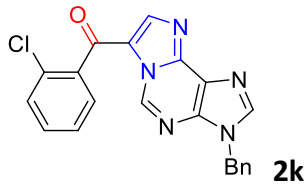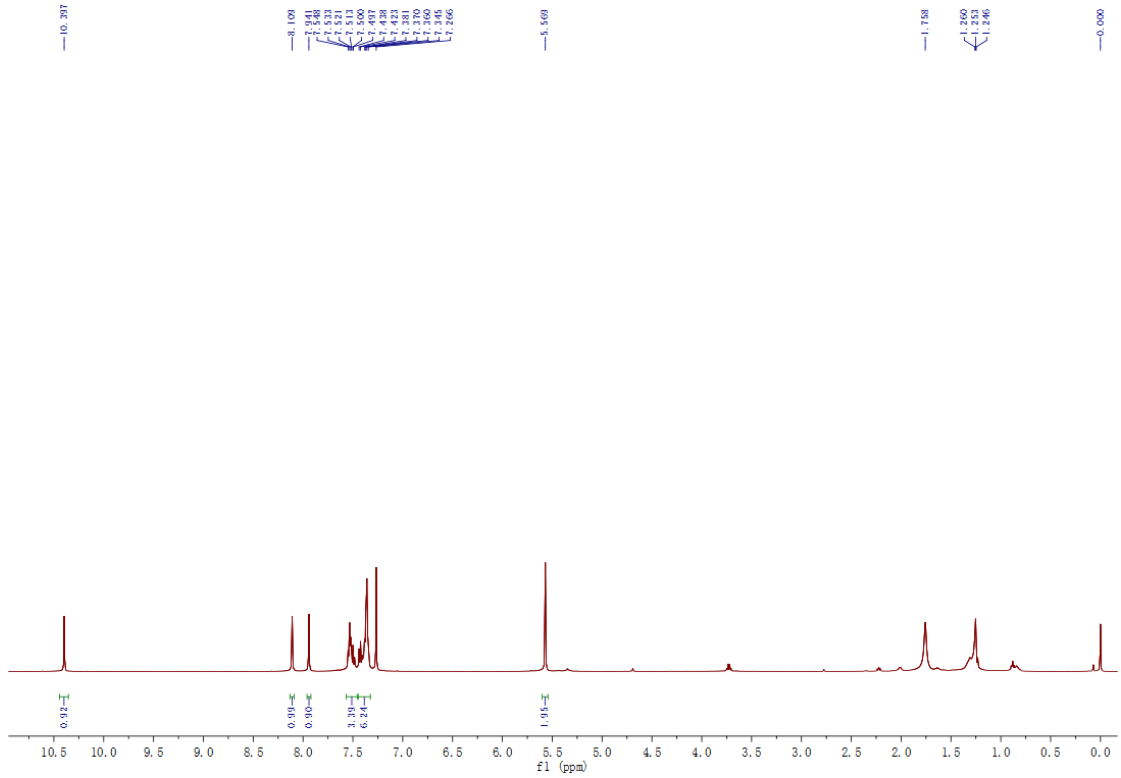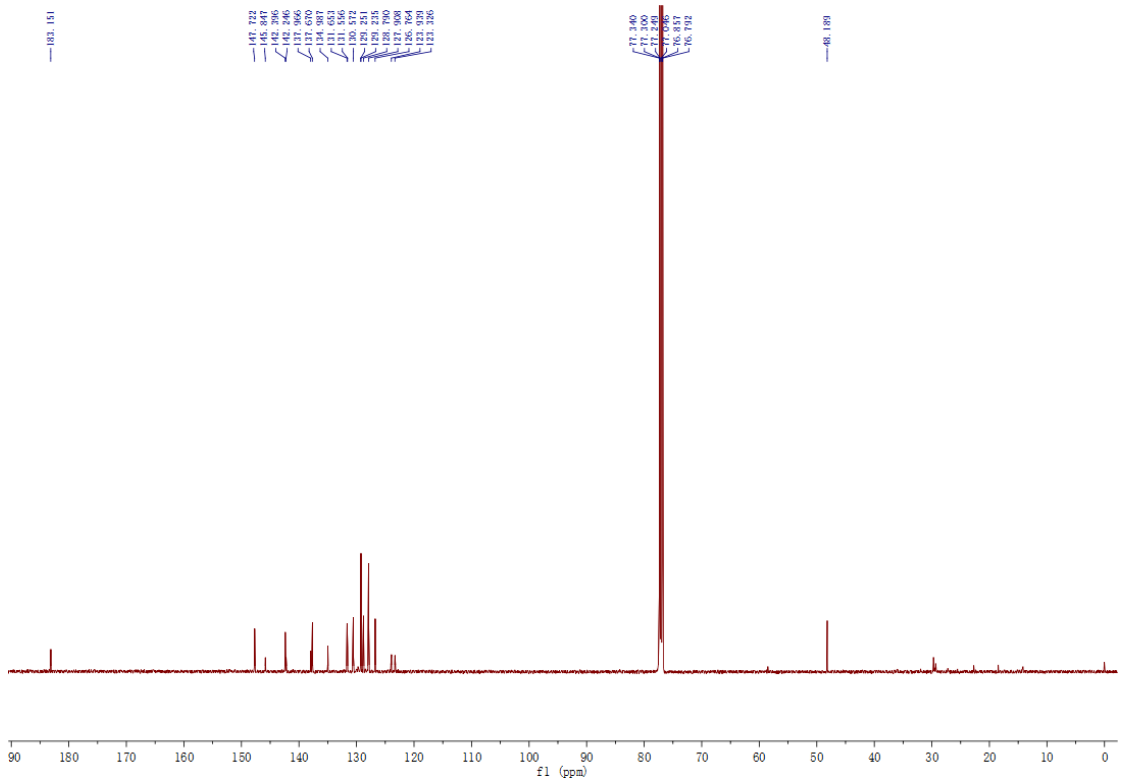

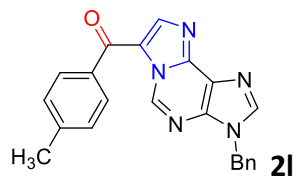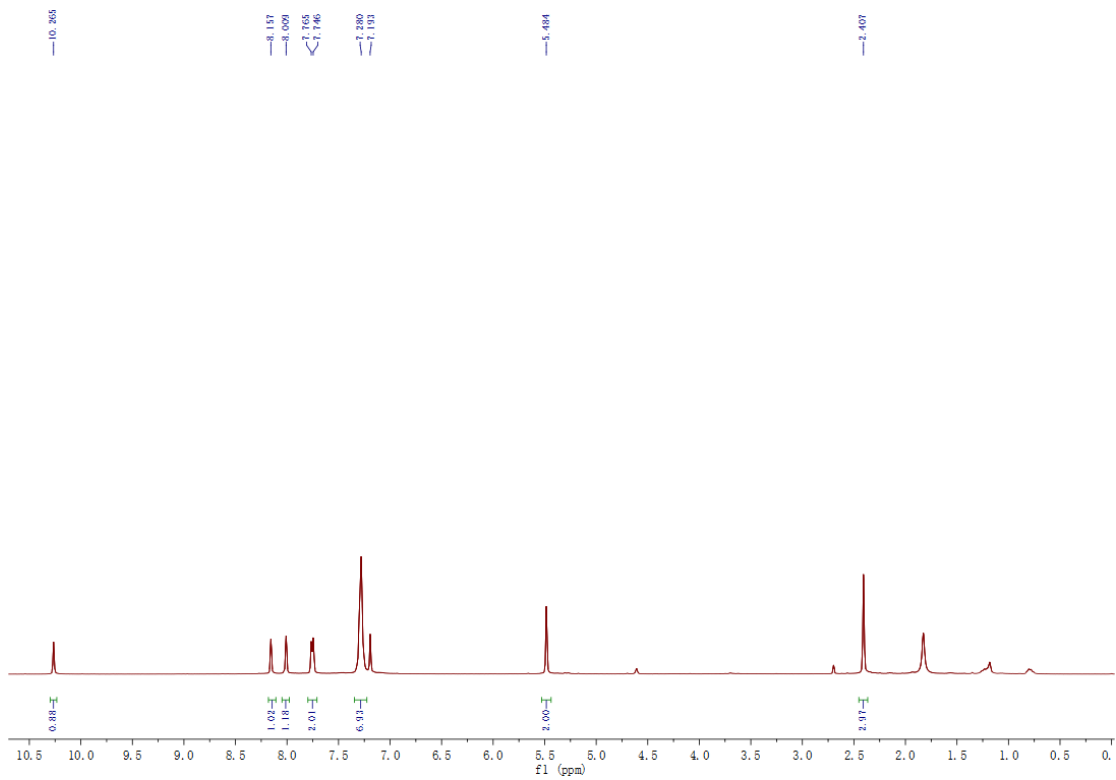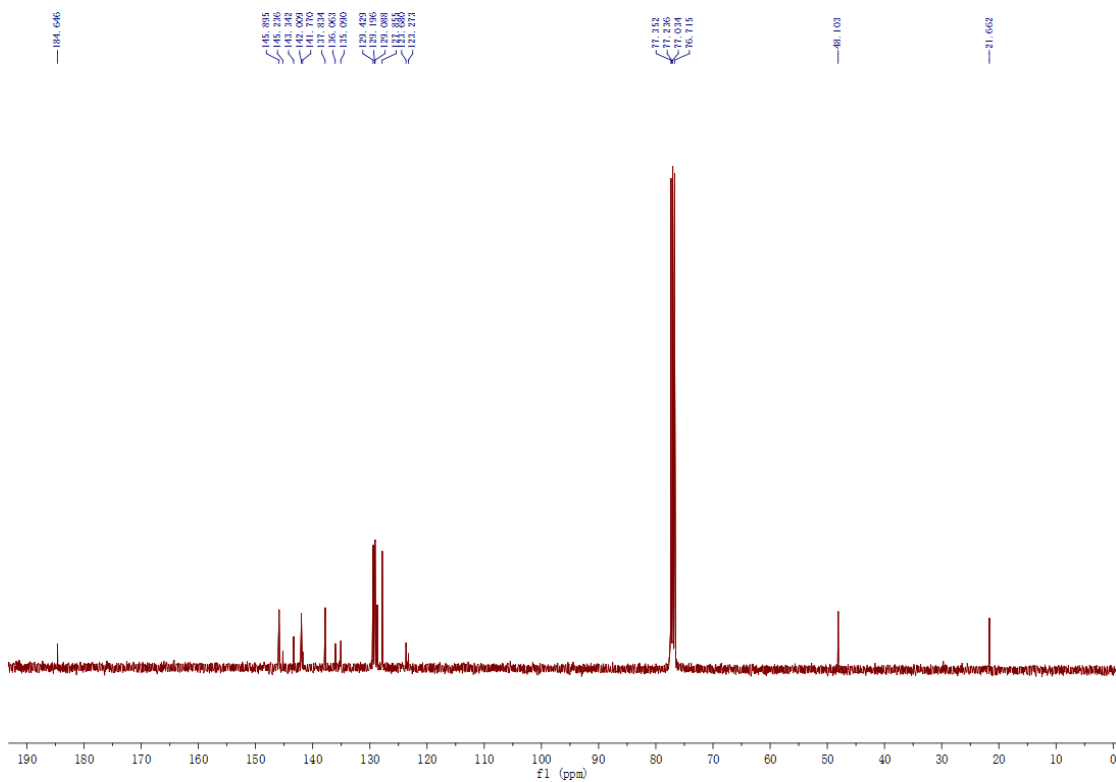



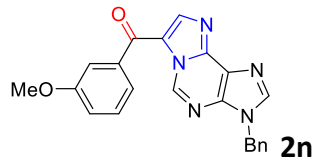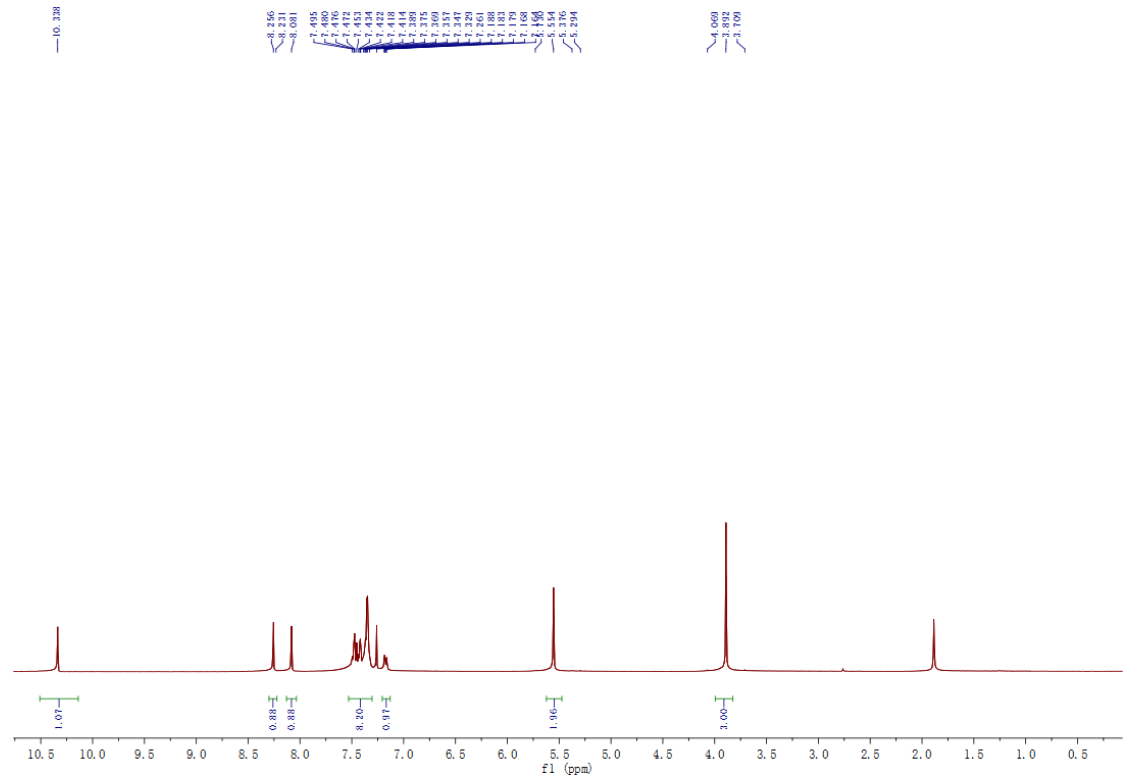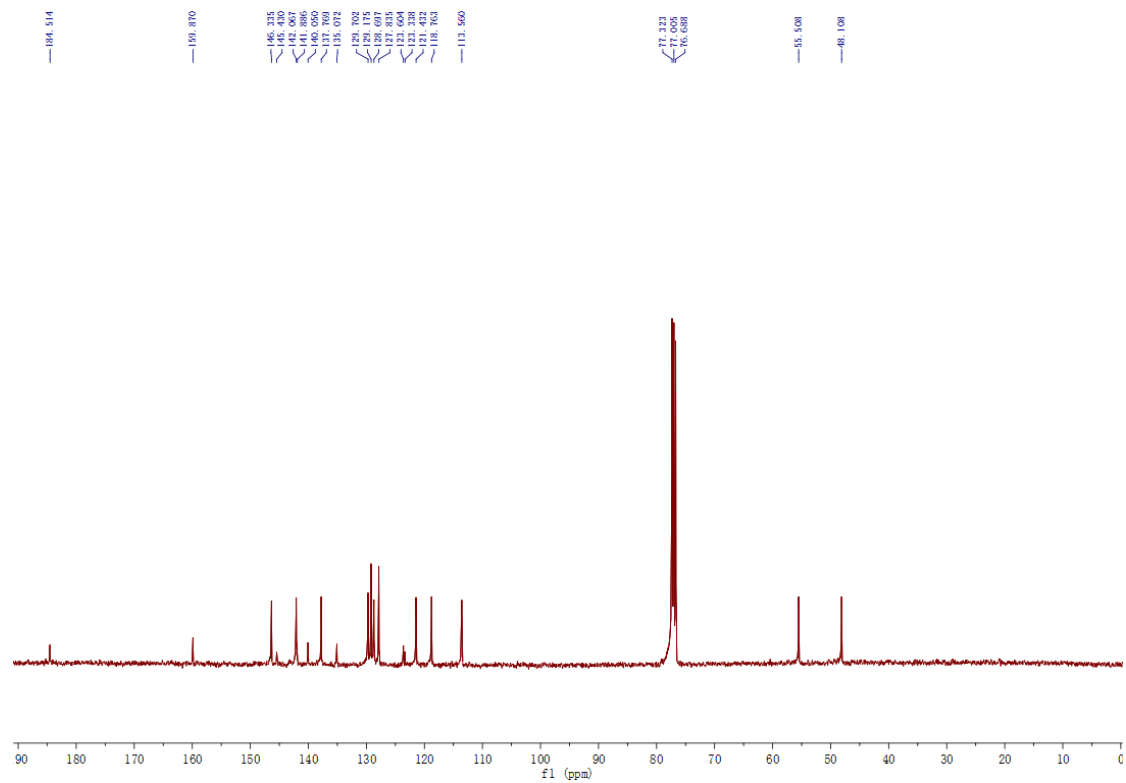

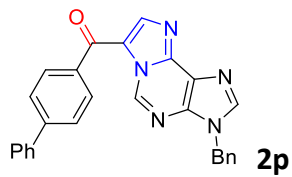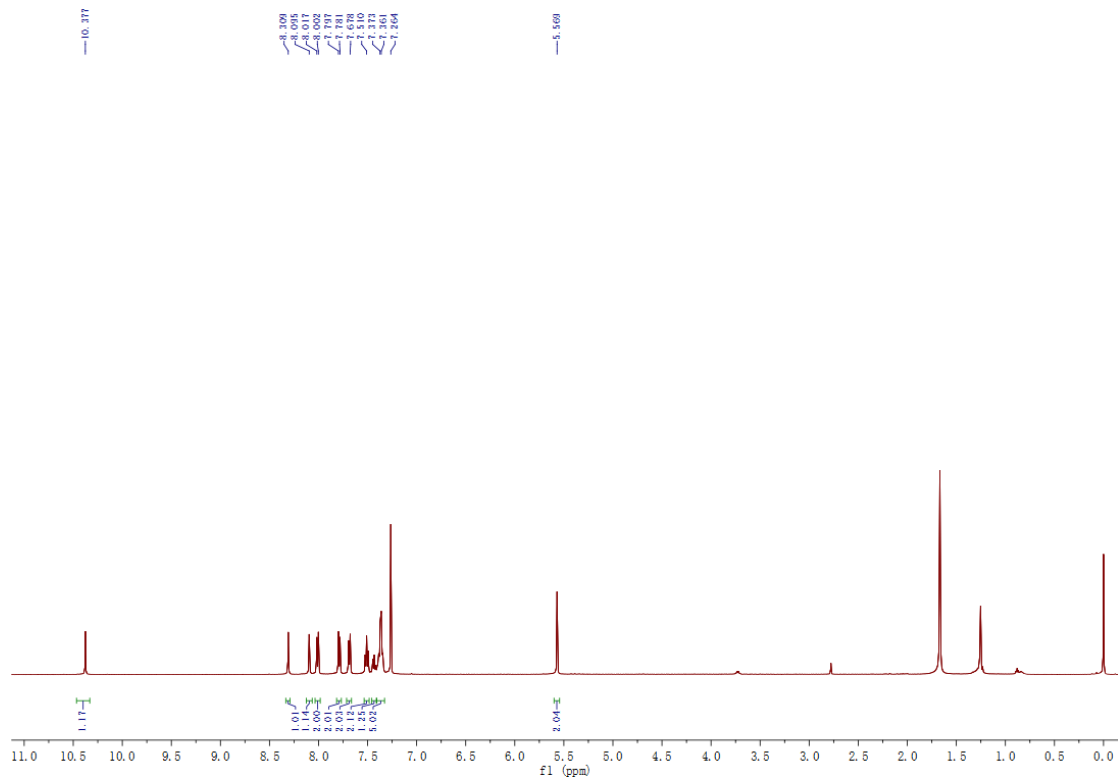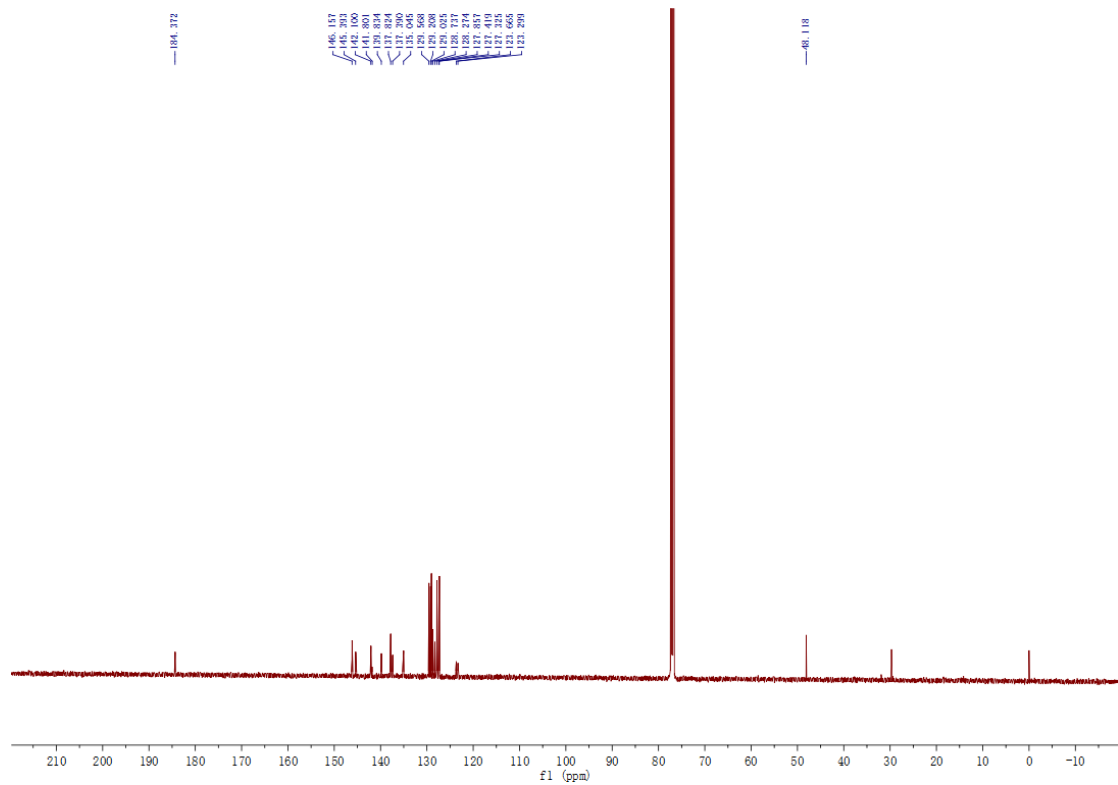

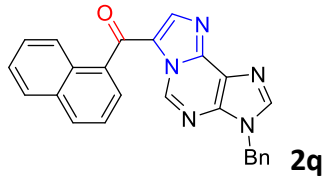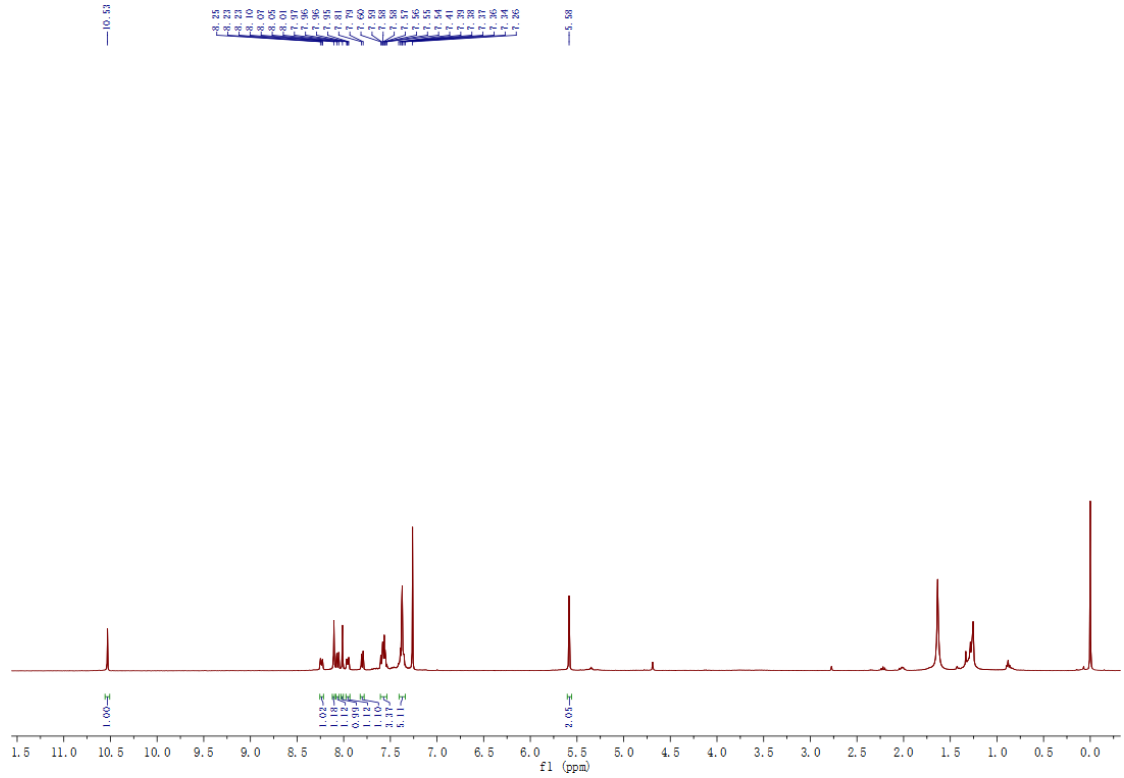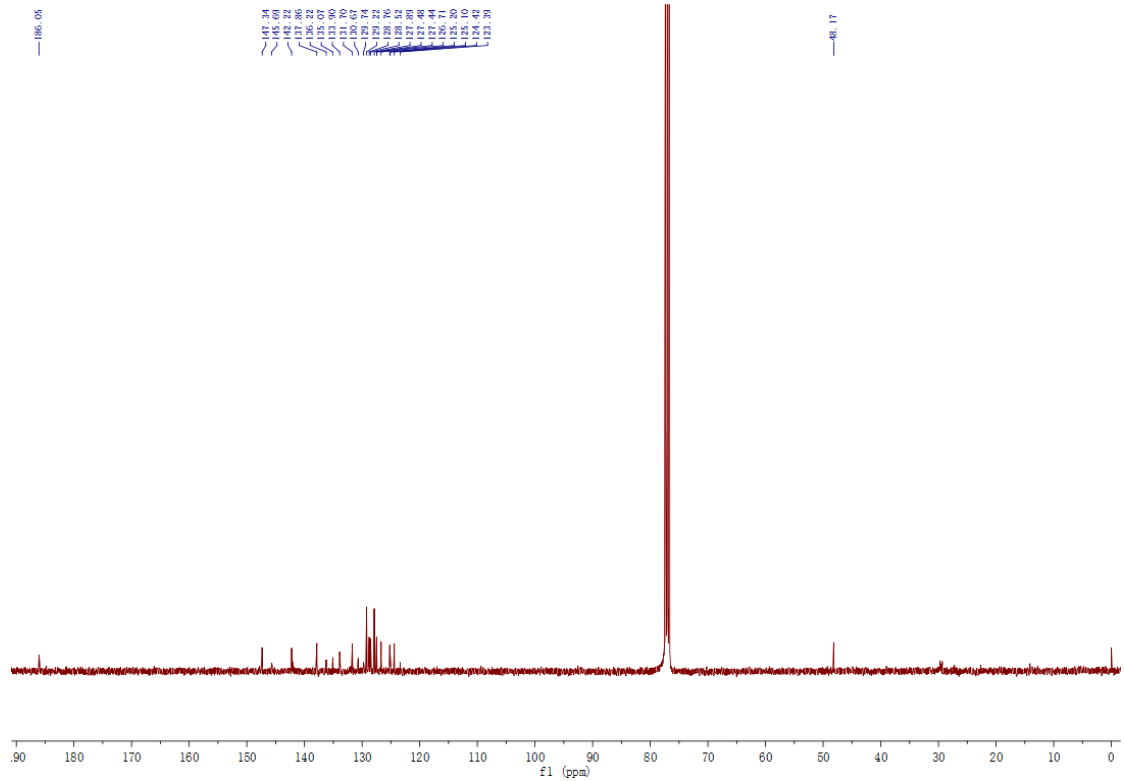

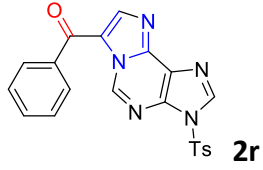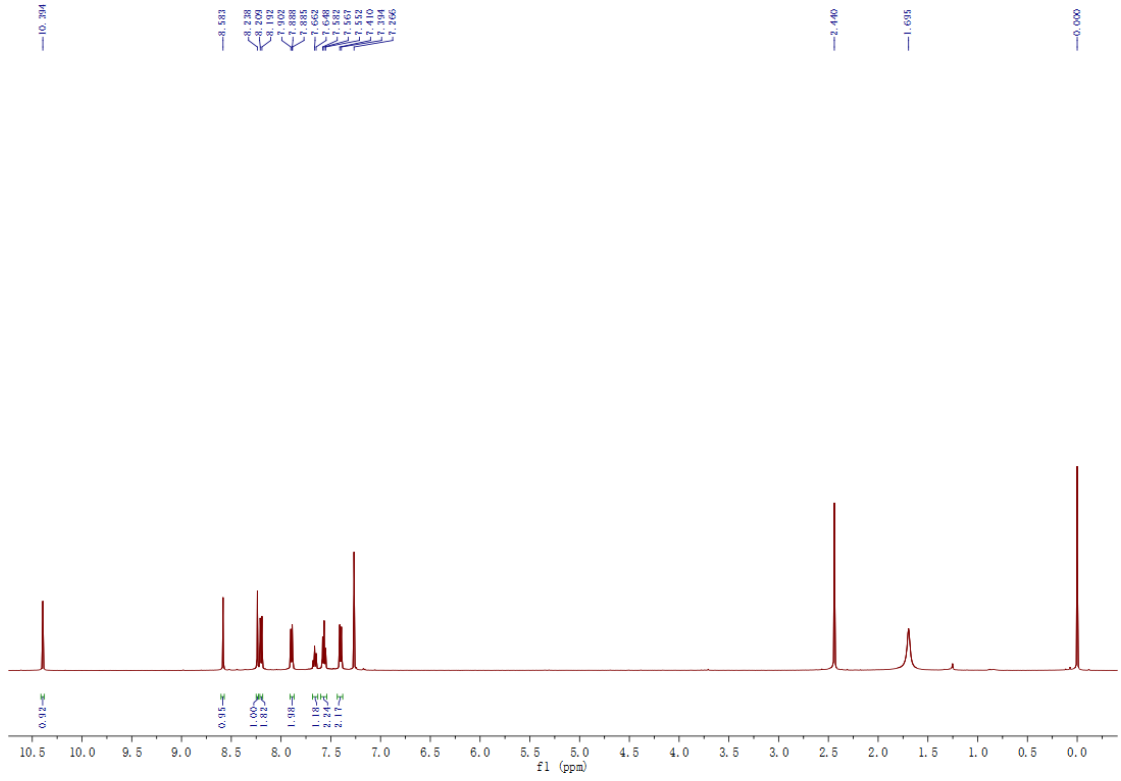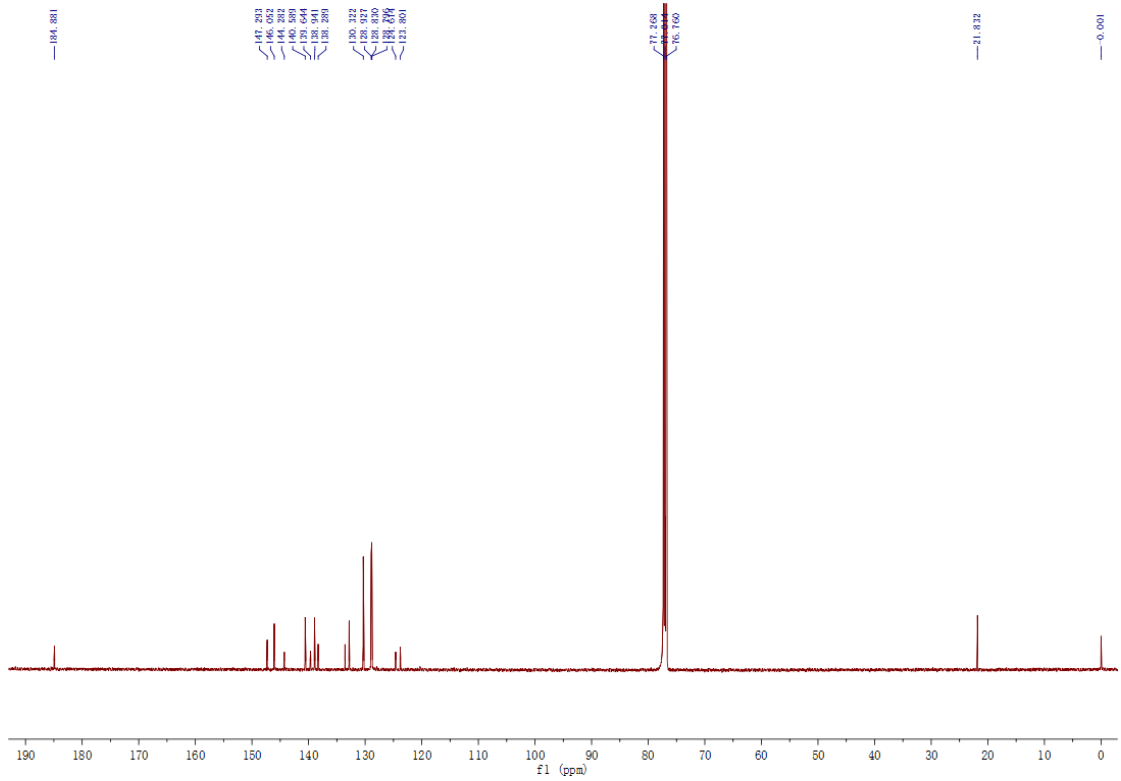

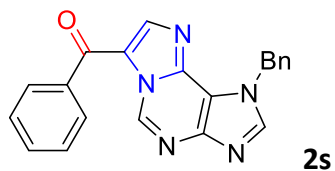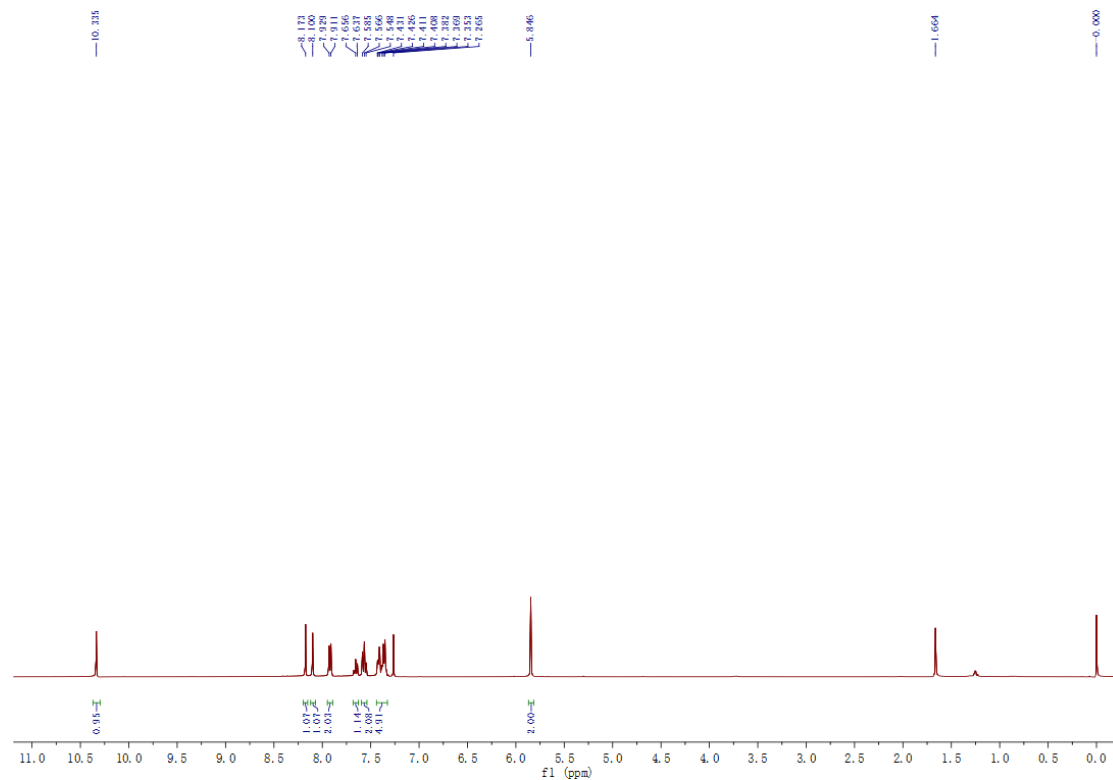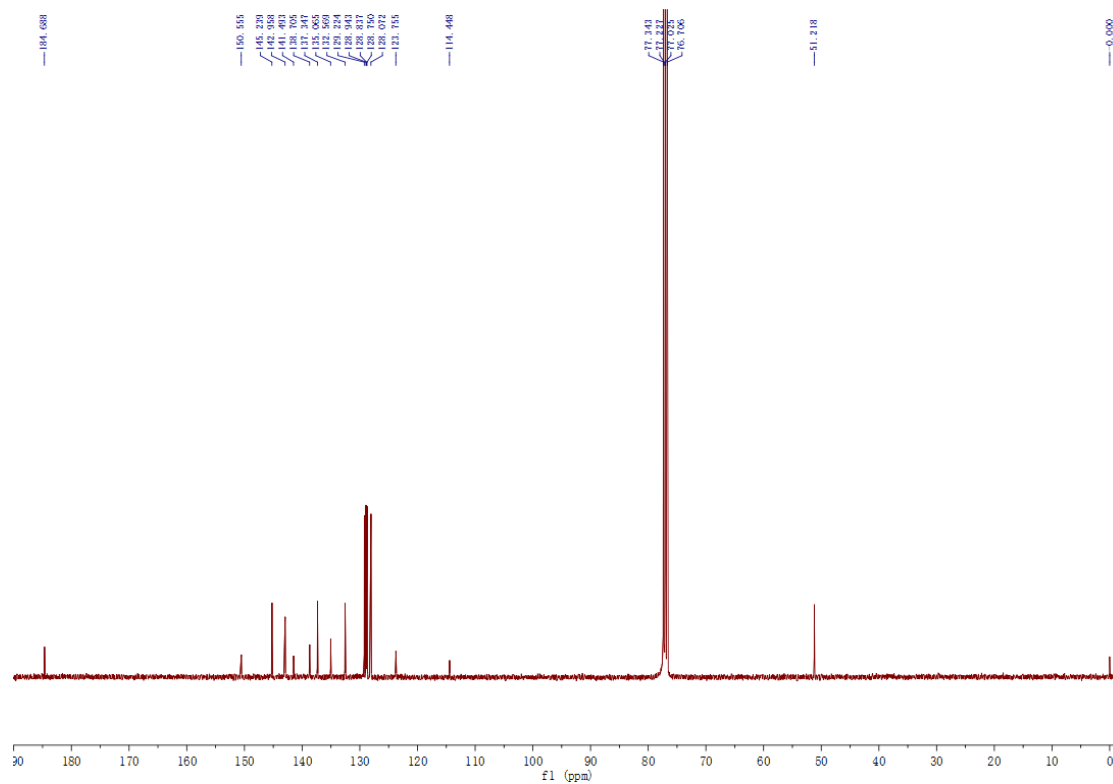

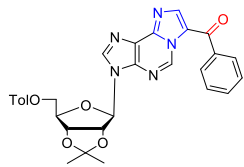

**2t**

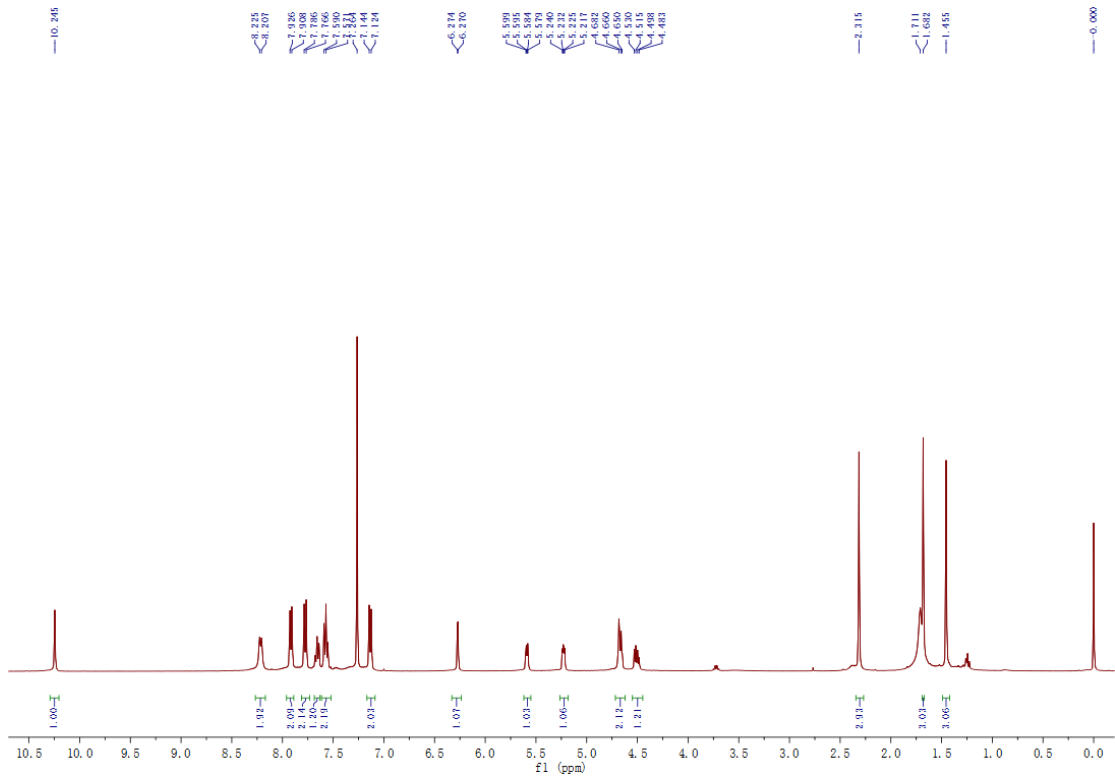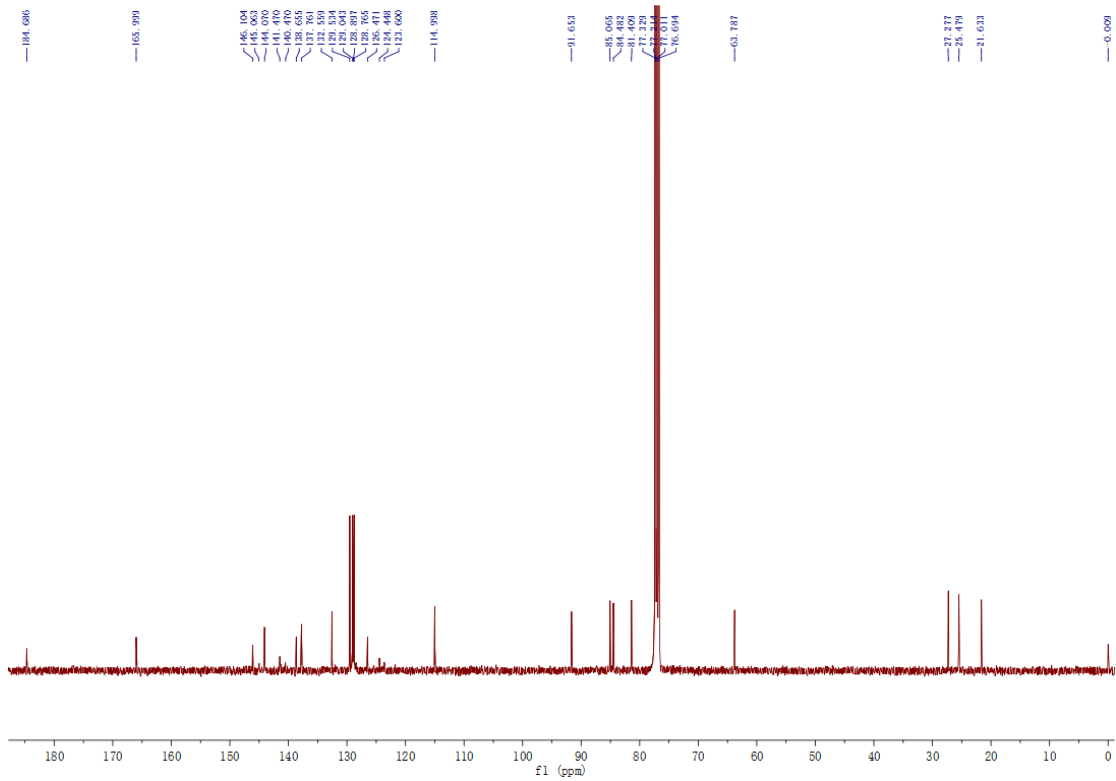

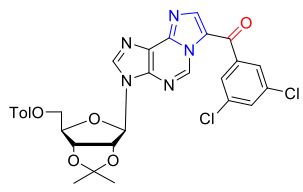

**2u**

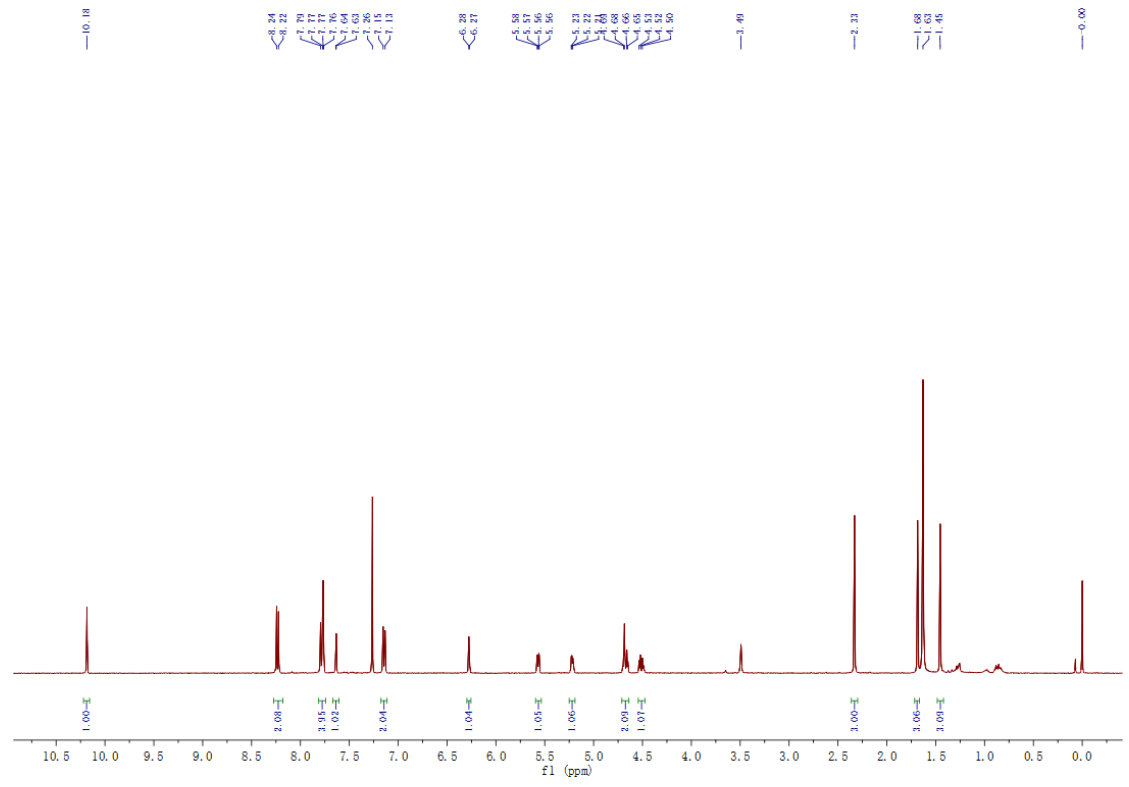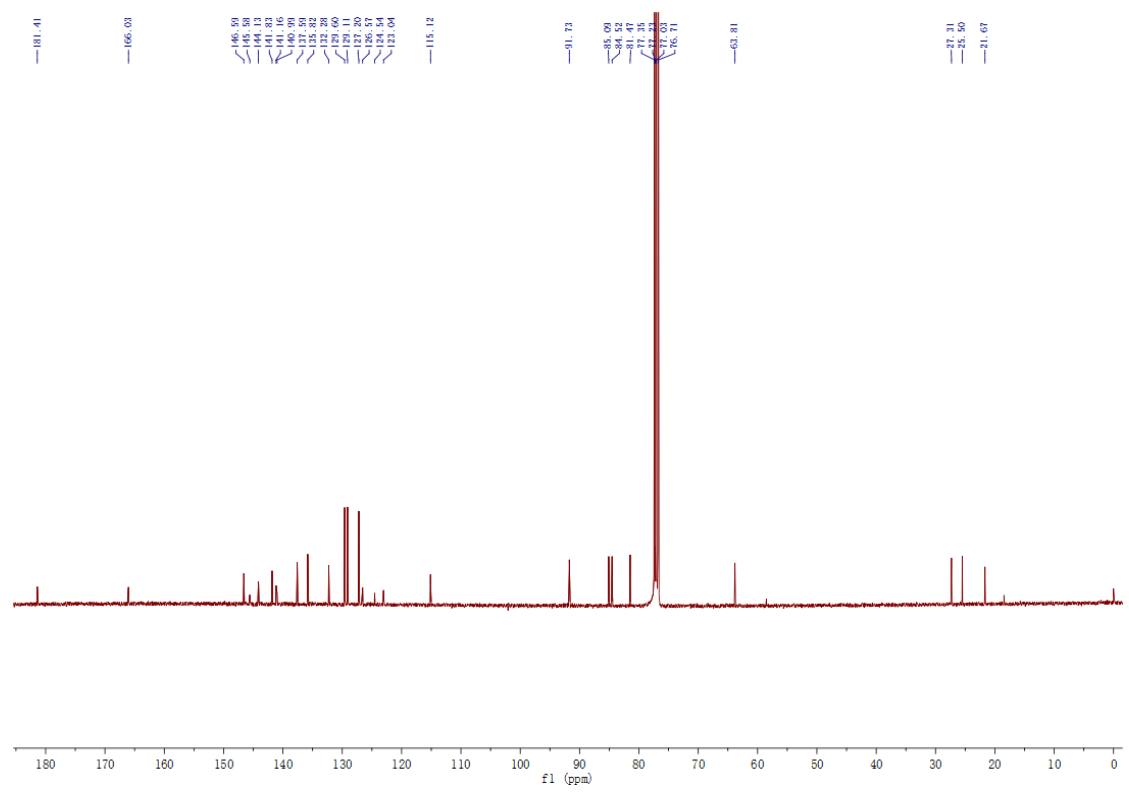

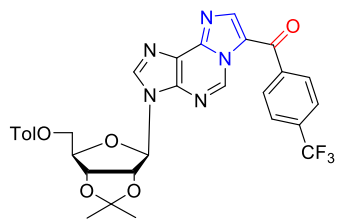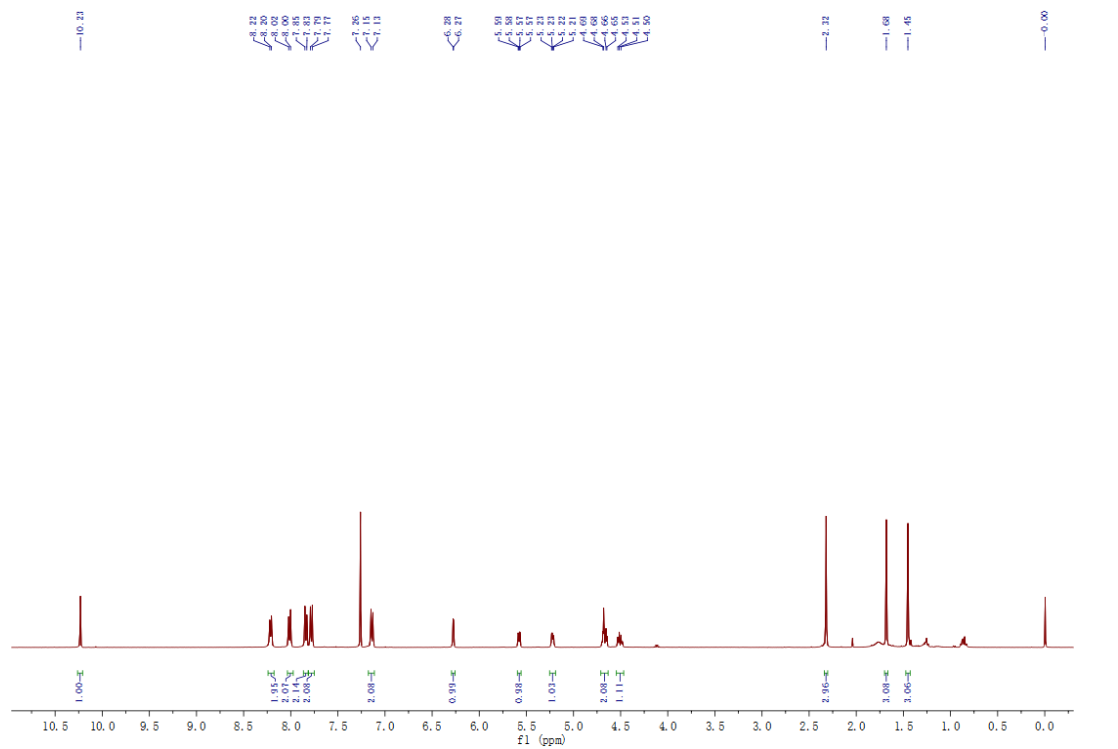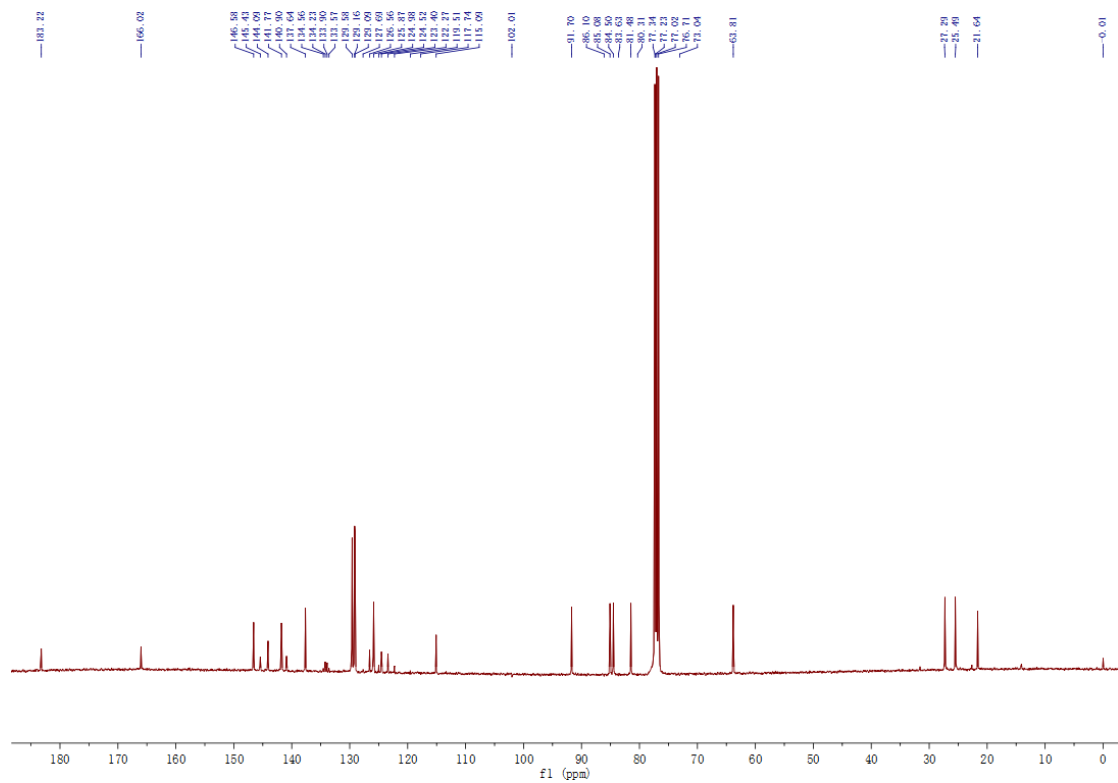



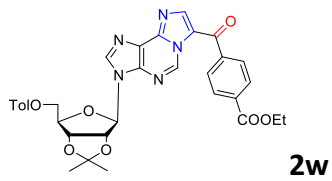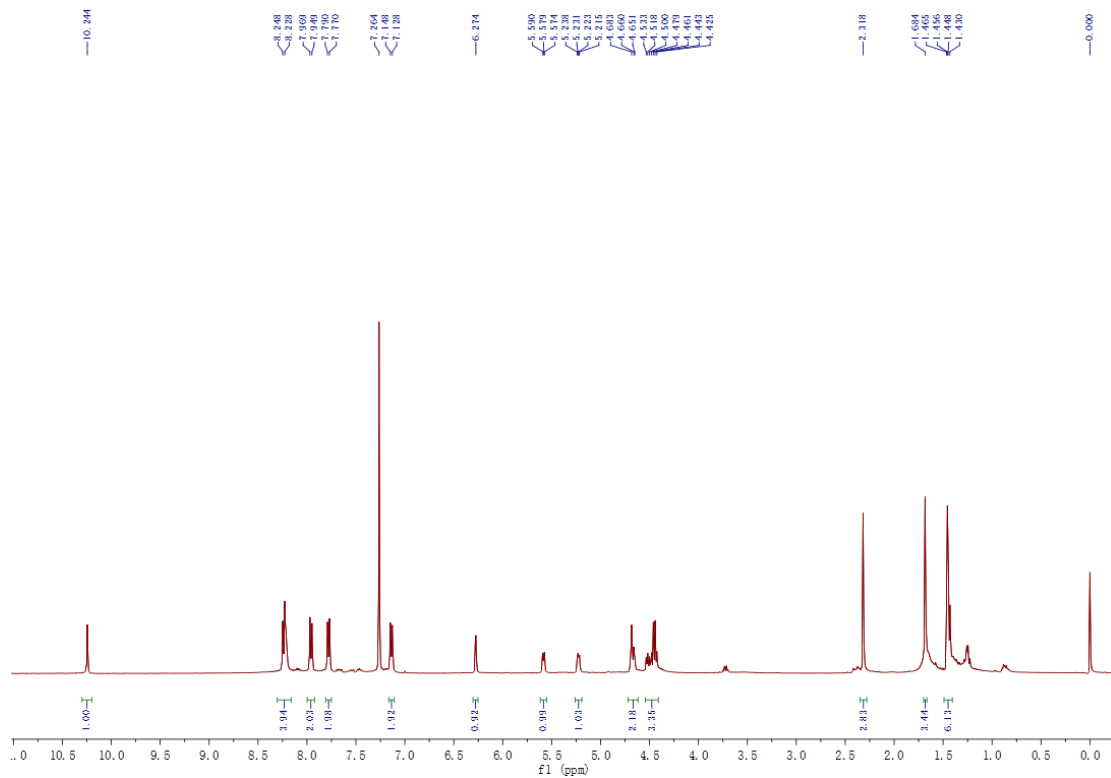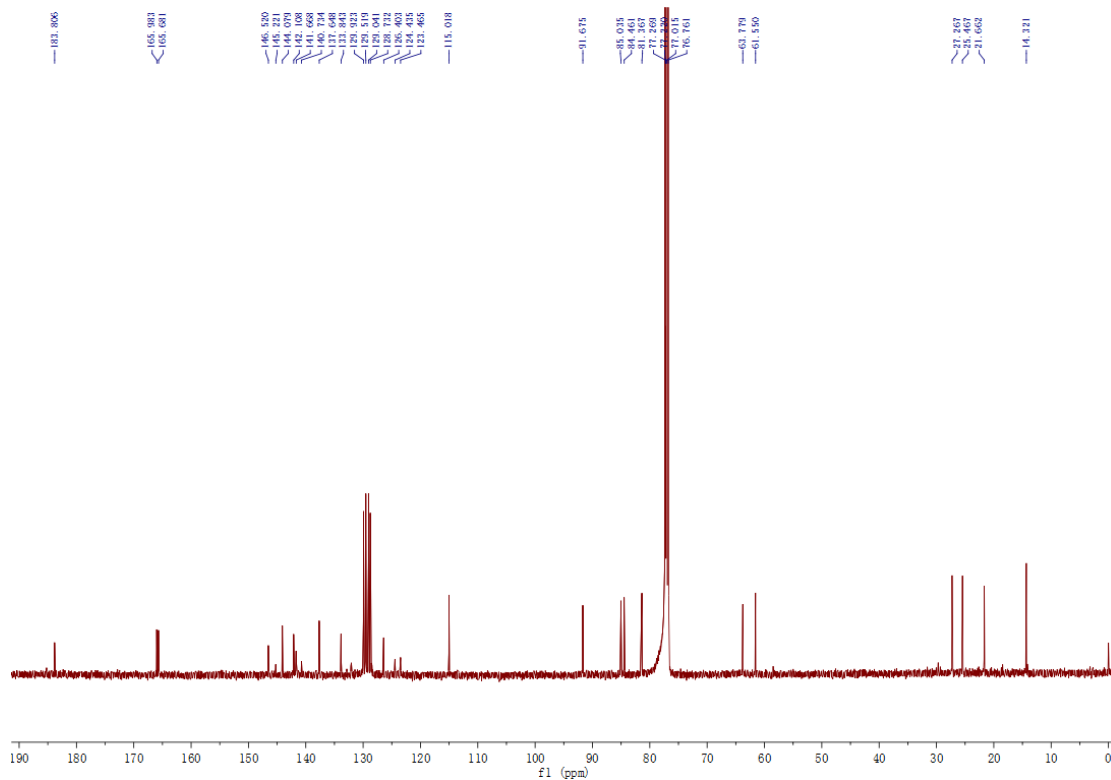

Supplement: c9ra09198j1.pdf [file c9ra09198j1.pdf]
